# Supplementary material for: Functional Gallic Acid-Based Dendrimers as Synthetic Nanotools to Remodel Amyloid-β-42 into Noncytotoxic Forms
Source: PubMed Central journal article supplement (PMC8704170; doi:10.1021/acsami.1c17823), 2021-12-07
Supplement: am1c17823_si_001.pdf [file am1c17823_si_001.pdf]

# SUPPLEMENTARY INFORMATION

## **Functional gallic acid-based dendrimers as synthetic nanotools to remodel amyloid-beta 42 into non-cytotoxic forms**

Ana R. Araújo<sup>1, 2\*</sup>, Juan Correa<sup>3</sup>, Vicente Dominguez-Arca<sup>4</sup>, Rui L. Reis<sup>1, 2</sup>, Eduardo Fernandez-Megia<sup>3\*</sup>, Ricardo A. Pires<sup>1, 2\*</sup>

<sup>1</sup>3B's Research Group, I3Bs – Research Institute on Biomaterials, Biodegradables and Biomimetics, University of Minho, Headquarters of the European Institute of Excellence on Tissue Engineering and Regenerative Medicine, AvePark, Parque de Ciência e Tecnologia, Zona Industrial da Gandra, 4805-017 Barco, Portugal

<sup>2</sup>ICVS/3B's–PT Government Associate Laboratory, Braga/Guimarães, Portugal

<sup>3</sup>Centro Singular de Investigación en Química Biolóxica e Materiais Moleculares (CIQUS), Departamento de Química Orgánica, Universidade de Santiago de Compostela, Jenaro de la Fuente s/n, 15782 Santiago de Compostela, Spain

<sup>4</sup>Biophysics and Interfaces Group, Department of Applied Physics, Faculty of Physics, University of Santiago de Compostela, 15782 Santiago de Compostela, Spain

\* E-mail: [rpires@i3bs.uminho.pt](mailto:rpires@i3bs.uminho.pt); [ef.megia@usc.es](mailto:ef.megia@usc.es); [anarita.araujo@i3bs.uminho.pt](mailto:anarita.araujo@i3bs.uminho.pt)

# Table of Contents

|          |                                                                                                |           |
|----------|------------------------------------------------------------------------------------------------|-----------|
| <b>1</b> | <b><i>Synthesis and characterization studies</i></b> .....                                     | <b>3</b>  |
|          | <b>Synthesis of Ga-terminated dendrimers</b> .....                                             | <b>3</b>  |
|          | Synthesis of Benzyl 3,4,5-tris(benzyloxy)benzoate .....                                        | 3         |
|          | Synthesis of 3,4,5-Tris(benzyloxy)benzoic acid .....                                           | 3         |
|          | Synthesis of 2[G0]-GaOBn .....                                                                 | 3         |
|          | Synthesis of 2[G0]-GaOH .....                                                                  | 4         |
|          | Synthesis of 2[G1]-GaOBn .....                                                                 | 4         |
|          | Synthesis of 2[G1]-GaOH .....                                                                  | 4         |
|          | Synthesis of 3[G1]-GaOBn .....                                                                 | 5         |
|          | Synthesis of 3[G1]-GaOH .....                                                                  | 5         |
|          | <b>Characterization of Ga-terminated dendrimers</b> .....                                      | <b>6</b>  |
|          | <b>Interference of the dendrimers in the A<math>\beta</math> supramolecular assembly</b> ..... | <b>28</b> |
| <b>2</b> | <b><i>Cell studies</i></b> .....                                                               | <b>49</b> |
|          | <b>Ability of the dendrimers to modulate the A<math>\beta</math> cytotoxicity</b> .....        | <b>49</b> |

# 1 SYNTHESIS AND CHARACTERIZATION STUDIES

## Synthesis of Ga-terminated dendrimers

*Synthesis of Benzyl 3,4,5-tris(benzyloxy)benzoate:*  $K_2CO_3$  (12.04 g, 87.15 mmol), benzyl bromide (14.91 g, 87.15 mmol) and NaI (2.61 g, 17.43 mmol) were added to a stirred solution of gallic acid (3.0 g, 17.43 mmol) in MeOH (180 mL). The reaction was refluxed for 16 h, cooled down to rt and then,  $H_2O$  (30 mL) was added. After evaporation, the mixture was diluted with  $H_2O$  (50 mL) and extracted with EtOAc (3 x 20 mL). The combined organic layers were dried and concentrated to give a crude product that was recrystallized from EtOH to give benzyl 3,4,5-tris(benzyloxy)benzoate as a white solid (8.19 g, 88%).  $^1H$  NMR (300 MHz,  $DMSO-d_6$ )  $\delta$ : 7.63-7.17 (m, 22H), 5.33 (s, 2H), 5.17 (s, 4H), 5.06 (s, 2H).  $^{13}C$  NMR (75 MHz,  $DMSO-d_6$ )  $\delta$ : 165.3, 152.3, 141.7, 137.5, 136.9, 136.4, 128.7, 128.6, 128.4, 128.2, 128.1, 127.9, 127.8, 124.8, 108.4, 74.3, 70.4, 66.2. HRMS (APCI-FIA-TOF, positive mode,  $m/z$ ): 531.2166. Calculated for  $[M+H]^+$ ,  $C_{35}H_{31}O_5$ : 531.2171. IR (neat, ATR)  $\nu_{max}$ : 3091, 3033, 1713, 1590, 1498, 1109  $cm^{-1}$ .

*Synthesis of 3,4,5-Tris(benzyloxy)benzoic acid:* A stirred solution of benzyl 3,4,5-tris(benzyloxy)benzoate (5.69 g, 10.7 mmol) in a 3M KOH solution in MeOH (285 mL) was refluxed overnight. The mixture was cooled down to rt and acidified (pH= 3-4) by addition of 3M HCl. The resulting precipitate was filtered, dissolved in EtOAc (80 mL) and washed with  $H_2O$  (40 mL). The aqueous phase was extracted with  $CH_2Cl_2$  (3 x 30 mL). The combined organic phase was dried and concentrated. The crude product was purified by automated MPLC (gradient from hexane to EtOAc, silica, 40 min) to afford 3,4,5-tris(benzyloxy)benzoic acid as a white solid (4.20 g, 89%).  $^1H$  NMR (300 MHz,  $DMSO-d_6$ )  $\delta$ : 7.53-7.22 (m, 17H), 5.18 (s, 4H), 5.03 (s, 2H).  $^{13}C$  NMR (75 MHz,  $DMSO-d_6$ )  $\delta$ : 166.9, 152.0, 140.9, 136.9, 128.4, 128.2, 128.1, 127.9, 127.6, 126.2, 108.2, 74.2, 70.2. HRMS (APCI-FIA-TOF, positive mode,  $m/z$ ): 441,1694. Calcd for  $[M+H]^+$ ,  $C_{28}H_{25}O_5$ : 441.1702. IR (neat, ATR)  $\nu_{max}$ : 3029, 1686, 1595, 1128  $cm^{-1}$ .

*Synthesis of 2[G0]-GaOBn:* 3,4,5-Tris(benzyloxy)benzoic acid (334 mg, 0.76 mmol), HOBT (103 mg, 0.76 mmol) and EDC (145 mg, 0.76 mmol) were added to a solution of 2,2'-(ethylenedioxy)bis(ethylamine) (45 mg, 0.30 mmol) in DMSO (6 mL). After 20 h of stirring at rt, the reaction mixture was distributed between EtOAc (30 mL) and brine (30 mL). The aqueous phase was extracted with EtOAc (3 x 30 mL). The combined organic phase was washed

with H<sub>2</sub>O (30 mL), dried and evaporated under vacuum. The crude product was purified by automated MPLC (gradient from hexane to 100% EtOAc and then to 100% CH<sub>2</sub>Cl<sub>2</sub>, neutral alumina, 25 min) to afford 2[G0]-GaOBn (255 mg, 85%) as a white solid. <sup>1</sup>H NMR (300 MHz, CDCl<sub>3</sub>) δ: 7.47-7.18 (m, 30H), 7.11 (s, 4H), 6.62-6.53 (m, 2H), 5.08 (s, 8H), 5.07 (s, 4H), 3.69-3.50 (m, 12H). <sup>13</sup>C NMR (75 MHz, CDCl<sub>3</sub>) δ: 167.2, 152.8, 141.4, 137.5, 136.8, 129.9, 128.6, 128.2, 128.1, 128.0, 127.6, 107.1, 75.1, 71.4, 70.2, 69.8, 39.8. IR (neat, ATR) ν<sub>max</sub>: 3310, 3064, 3033, 1634, 1581, 1112 cm<sup>-1</sup>.

*Synthesis of 2[G0]-GaOH:* Pd/C (16 mg, 10%) was added to a solution of 2[G0]-GaOBn (160 mg, 0.16 mmol) in a mixture of DMF-MeOH 3:1 (4 mL). The resulting mixture was stirred under H<sub>2</sub> (1 atm) for 20 h. The catalyst was removed by filtration through Celite. The filtrate was concentrated and then purified by short column chromatography (MeOH-CH<sub>2</sub>Cl<sub>2</sub>-H<sub>2</sub>O 3:3:0.2, silica) to give 2[G0]-GaOH as a green solid (71 mg, 98%). <sup>1</sup>H NMR (300 MHz, CD<sub>3</sub>OD) δ: 6.85 (s, 4H), 3.67-3.57 (m, 8H), 3.50 (t, *J*=5.5 Hz, 4H). IR (KBr) ν<sub>max</sub>: 3319, 1636, 1592, 1338, 1033 cm<sup>-1</sup>.

*Synthesis of 2[G1]-GaOBn:* 3,4,5-Tris(benzyloxy)benzoic acid (466 mg, 1.06 mmol), Et<sub>3</sub>N (0.224 mL, 1.06 mmol), HOBt (143 mg, 1.06 mmol) and EDC (210 mg, 1.06 mmol) were added to a solution of 2[G1]-NH<sub>2</sub>·HCl (205 mg, 0.14 mmol) in DMSO (8 mL). After 24 h of stirring at rt, the reaction mixture was distributed between EtOAc (50 mL) and brine (50 mL). The aqueous phase was extracted with EtOAc (3 x 50 mL). The combined organic phase was washed with 0.1M HCl (30 mL) and H<sub>2</sub>O (50 mL), dried and evaporated under vacuum. The crude product was purified by automated MPLC (gradient from EtOAc to 25% MeOH, neutral alumina, 25 min) to afford 2[G1]-GaOBn (428 mg, 75%) as a pale yellow solid. <sup>1</sup>H NMR (300 MHz, CDCl<sub>3</sub>) δ: 7.40-7.10 (m, 102H), 6.97 (s, 4H), 5.03-4.94 (m, 36H), 4.07 (t, *J*=3.5 Hz, 4H), 3.96 (t, *J*=3.7 Hz, 8H), 3.75-3.38 (m, 72H). <sup>13</sup>C NMR (75 MHz, CDCl<sub>3</sub>) δ: 167.2, 167.1, 152.5, 152.1, 140.9, 137.4, 136.7, 129.8, 128.4, 128.1, 127.8, 127.7, 127.4, 106.9, 75.0, 72.2, 71.1, 70.5, 70.3, 70.1, 70.0, 69.8, 69.6, 69.5, 68.6, 40.7, 39.7. IR (neat, ATR) ν<sub>max</sub>: 3314, 3065, 3032, 1634, 1580, 1100 cm<sup>-1</sup>.

*Synthesis of 2[G1]-GaOH:* Pd/C (60 mg, 20%) was added to a solution of 2[G1]-GaOBn (300 mg, 0.075 mmol) in a mixture of EtOAc-MeOH 1:1 (8 mL). The resulting mixture was stirred under H<sub>2</sub> (1 atm) for 14 h. The catalyst was removed by filtration through Celite. The filtrate was concentrated and then purified by short column chromatography (MeOH-CH<sub>2</sub>Cl<sub>2</sub>-H<sub>2</sub>O

3:3:0.2, silica) to give 2[G1]-GaOH as a green solid (133 mg, 82%). <sup>1</sup>H NMR (300 MHz, CD<sub>3</sub>OD) δ: 7.10 (s, 4H), 6.84 (s, 12H), 4.15-4.03 (m, 12H), 3.82-3.43 (m, 72H). IR (KBr) ν<sub>max</sub>: 3296, 1625, 1593, 1330, 1116, 1097 cm<sup>-1</sup>.

*Synthesis of 3[G1]-GaOBn:* 3,4,5-Tris(benzyloxy)benzoic acid (268 mg, 0.61 mmol), Et<sub>3</sub>N (0.128 mL, 0.61 mmol), HOBt (82 mg, 0.61 mmol) and EDC (120 mg, 0.61 mmol) were added to a solution of 3[G1]-NH<sub>2</sub>·HCl (134 mg, 0.05 mmol) in DMSO (4.9 mL). After 36 h of stirring at rt, the reaction mixture was distributed between EtOAc (50 mL) and brine (50 mL). The aqueous phase was extracted with EtOAc (3 x 50 mL). The combined organic phase was washed with 0.1M HCl (30 mL) and H<sub>2</sub>O (50 mL), dried and evaporated under vacuum. The crude product was purified by automated MPLC (gradient from EtOAc to 25% MeOH, neutral alumina, 25 min) to afford 3[G1]-GaOBn (413 mg, 84%) as a pale yellow solid. <sup>1</sup>H NMR (300 MHz, CDCl<sub>3</sub>) δ: 7.37-7.08 (m, 153H), 6.89 (s, 6H), 5.91 (s, 3H), 4.93 (s, 54H), 4.04-3.81 (m, 24H), 3.67-3.33 (m, 120H). <sup>13</sup>C NMR (75 MHz, CDCl<sub>3</sub>) δ: 167.2, 160.4, 152.6, 152.1, 140.9, 137.5, 136.7, 129.9, 129.8, 128.4, 128.1, 127.9, 127.5, 107.0, 106.8, 94.3, 75.1, 72.2, 71.2, 71.1, 70.5, 70.3, 70.1, 69.8, 69.5, 68.6, 67.3, 40.0. IR (neat, ATR) ν<sub>max</sub>: 3319, 3069, 3034, 1635, 1581, 1108 cm<sup>-1</sup>.

*Synthesis of 3[G1]-GaOH:* Pd/C (10 mg, 20%) was added to a solution of 3[G1]-GaOBn (49 mg, 0.008 mmol) in a mixture of DMF-MeOH 4:1 (3 mL). The resulting mixture was stirred under H<sub>2</sub> (1 atm) for 24 h. The catalyst was removed by filtration through Celite. The filtrate was concentrated and then purified by short column chromatography (MeOH-CH<sub>2</sub>Cl<sub>2</sub>-H<sub>2</sub>O 3:3:0.2, silica) to give 3[G1]-GaOH as a green solid (26 mg, 90%). <sup>1</sup>H NMR (300 MHz, DMSO-d<sub>6</sub>) δ: 7.17 (s, 6H), 6.81 (s, 18H), 6.07 (s, 3H) 4.18-3.94 (m, 24H), 3.80-3.20 (m, 120H). IR (KBr) ν<sub>max</sub>: 3334, 1629, 1597, 1336, 1109, 1097 cm<sup>-1</sup>.

## Characterization of Ga-terminated dendrimers

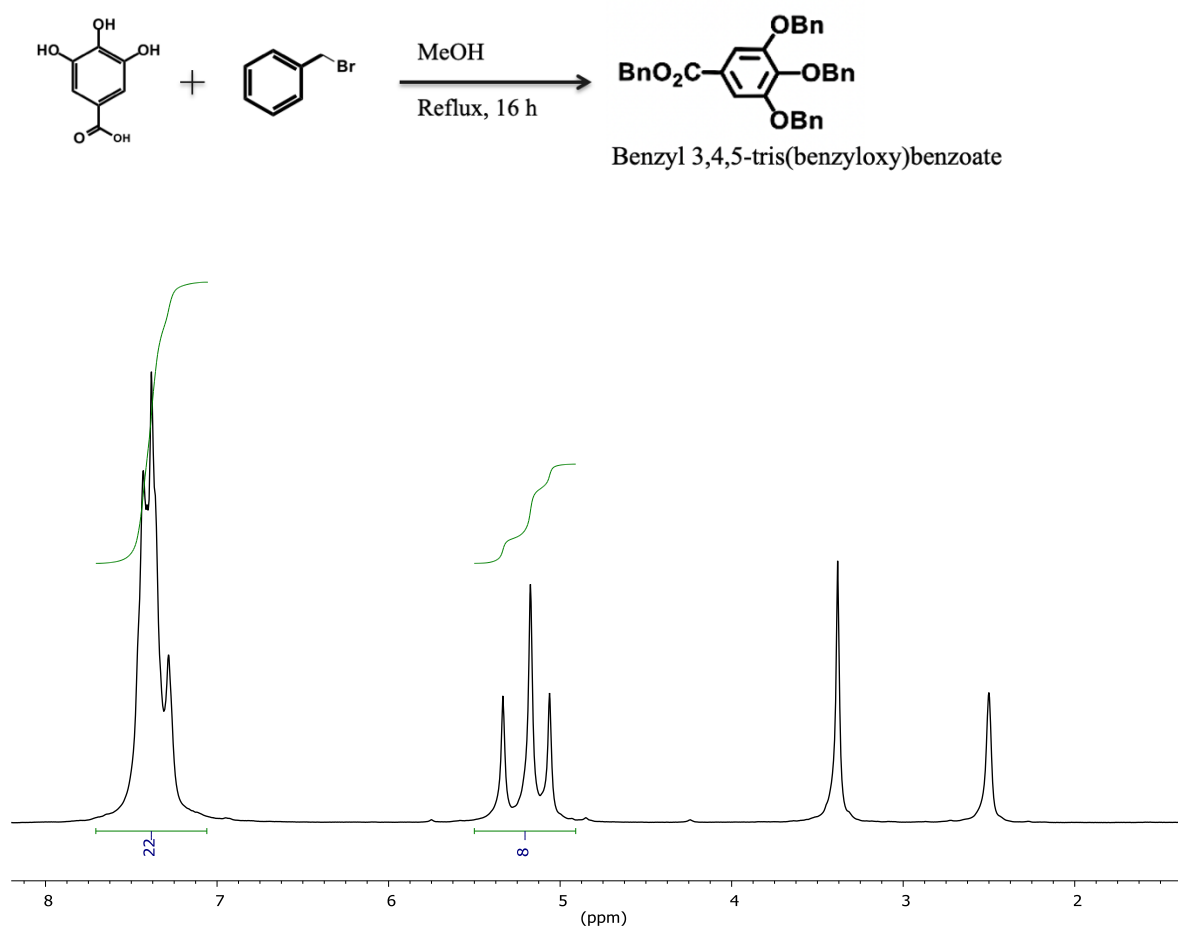

**Figure S1.** <sup>1</sup>H NMR spectrum (DMSO-d<sub>6</sub>) of benzyl 3,4,5-tris(benzyloxy)benzoate.

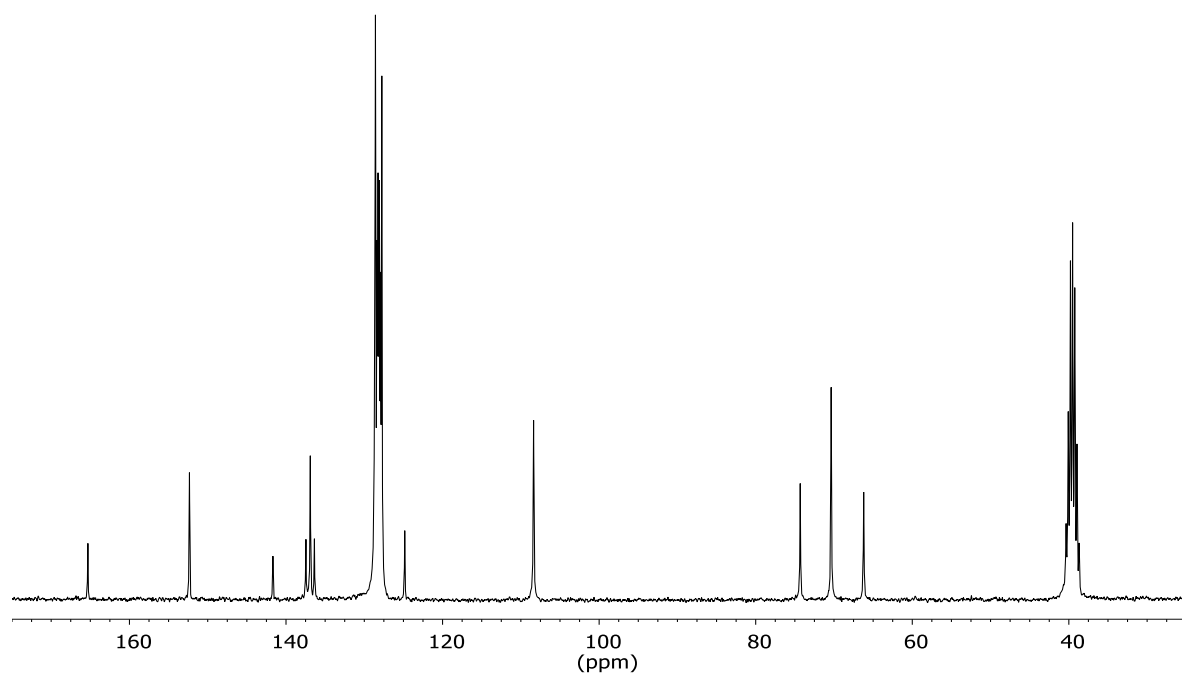

**Figure S2.**  $^{13}\text{C}$  NMR spectrum (DMSO- $d_6$ ) of benzyl 3,4,5-tris(benzyloxy)benzoate.

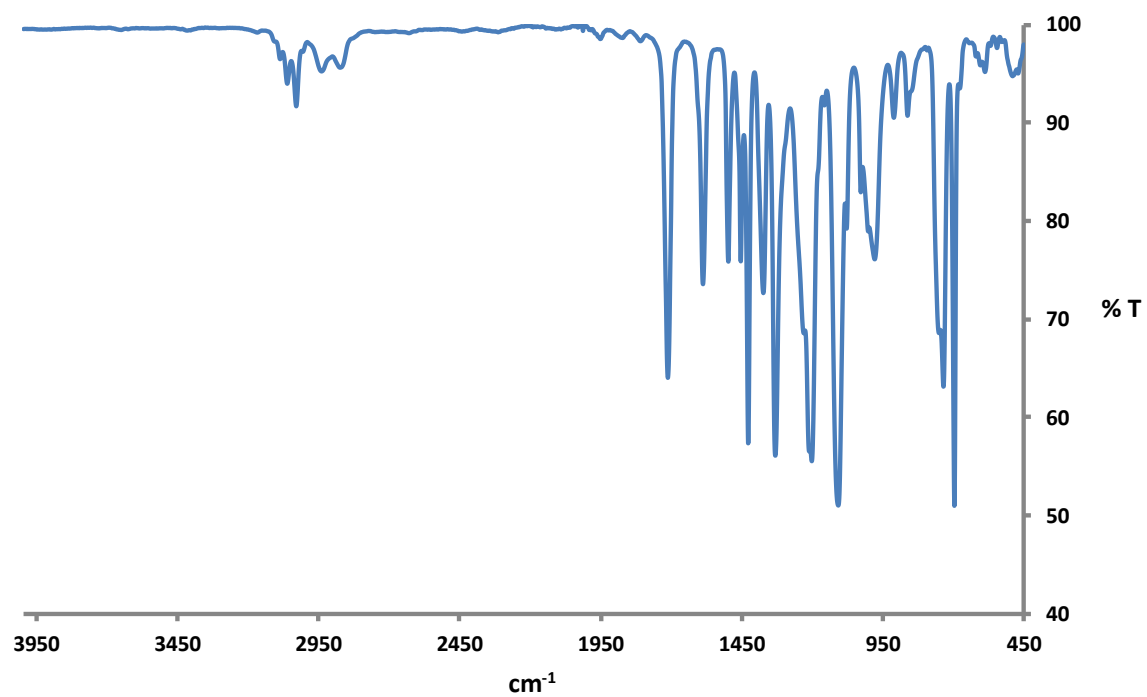

**Figure S3.** IR spectrum of benzyl 3,4,5-tris(benzyloxy)benzoate.



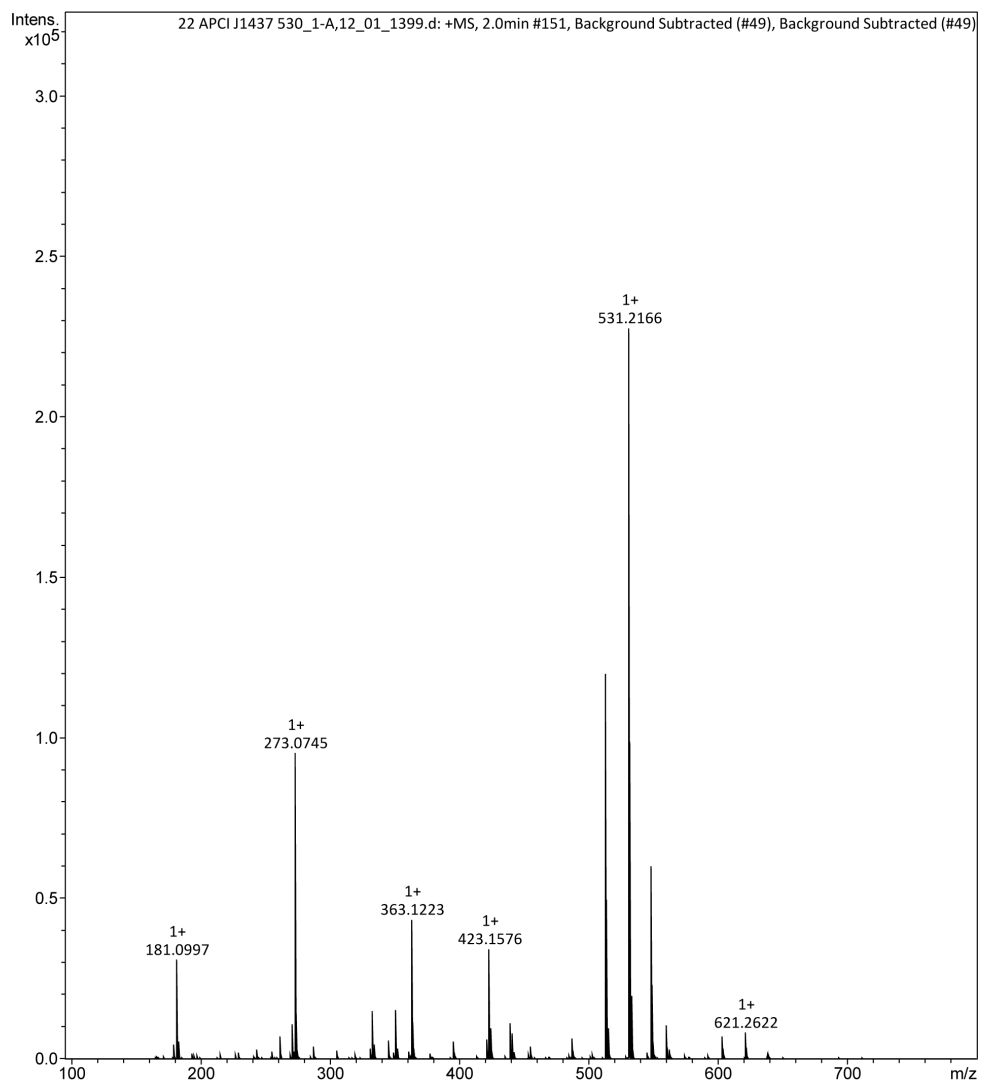

**Figure S4.** HR-MS of benzyl 3,4,5-tris(benzyloxy)benzoate.

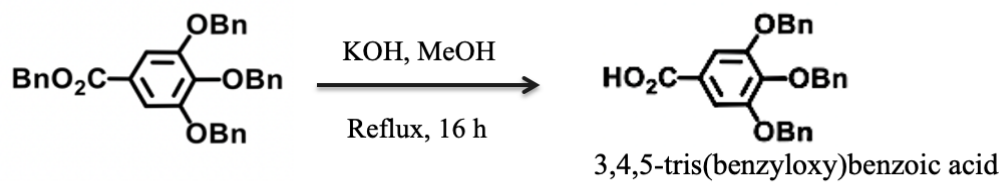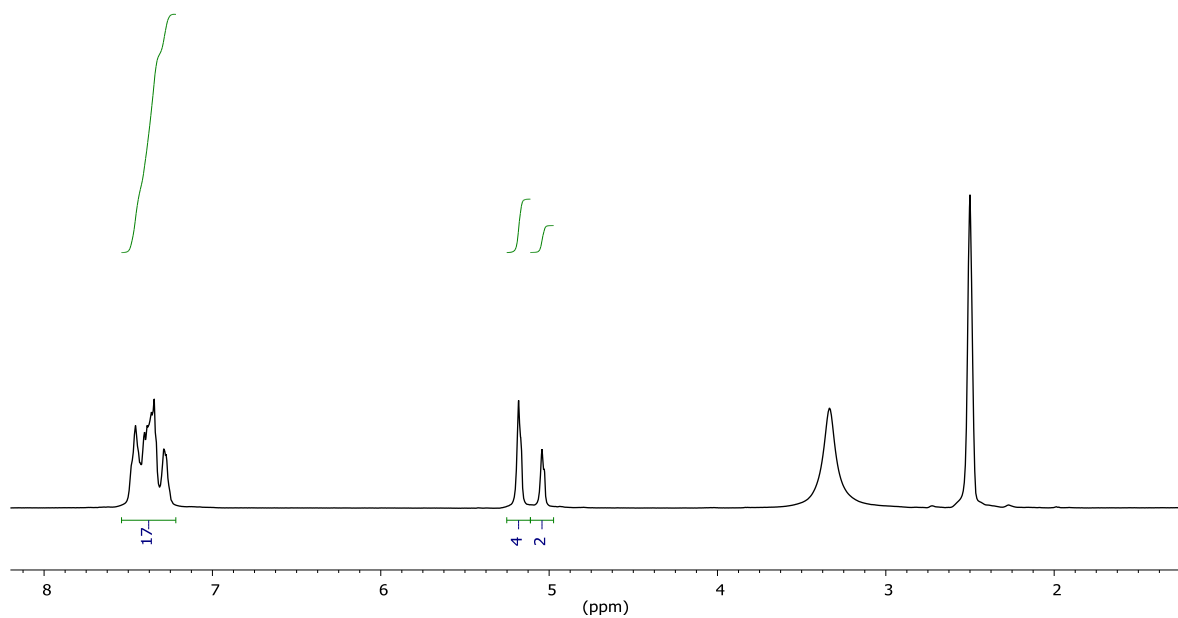

**Figure S5.** <sup>1</sup>H NMR spectrum (DMSO-d<sub>6</sub>) of 3,4,5-tris(benzyloxy)benzoic acid.

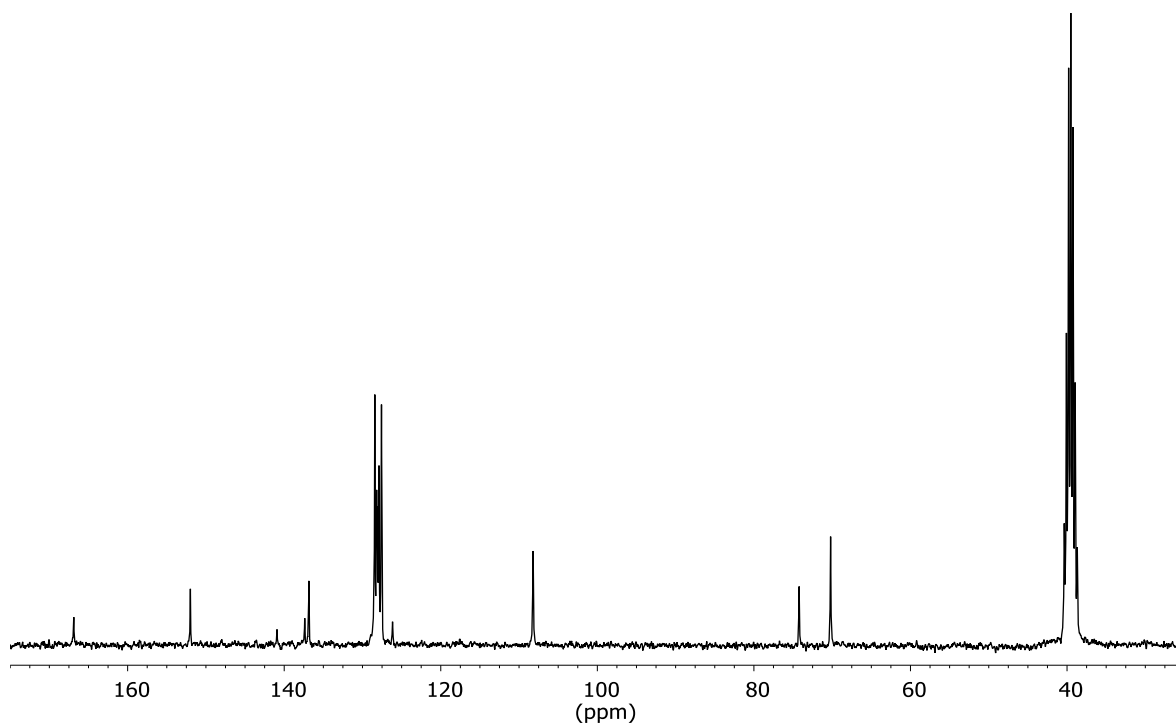

**Figure S6.**  $^{13}\text{C}$  NMR spectrum ( $\text{DMSO-d}_6$ ) of 3,4,5-tris(benzyloxy)benzoic acid.

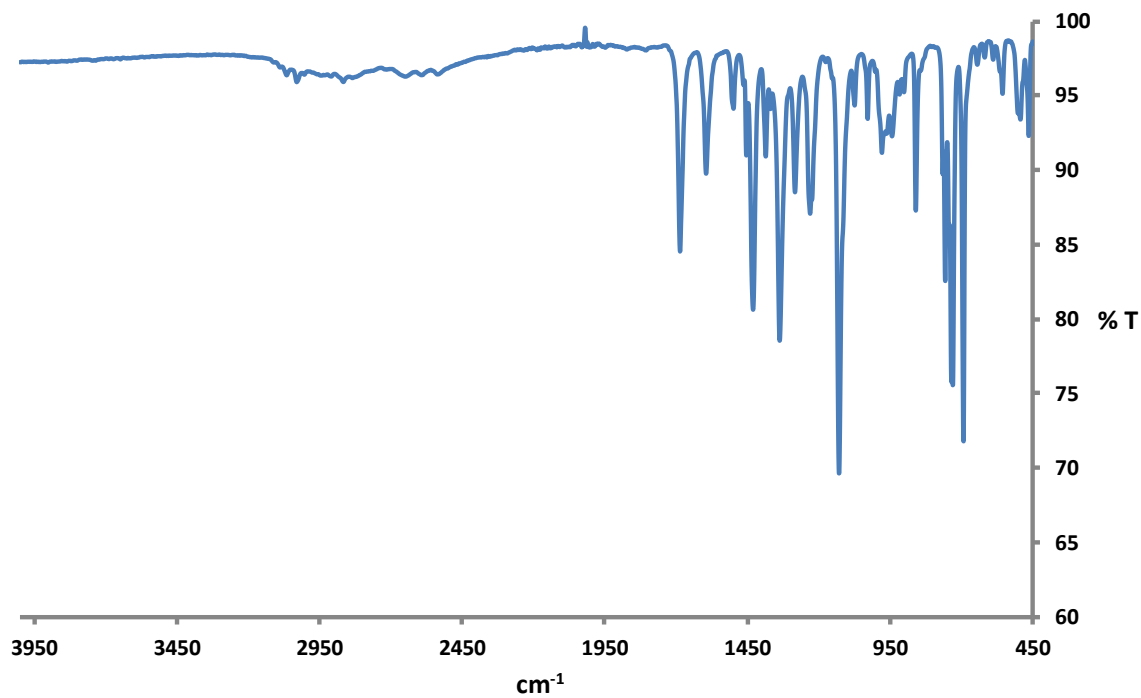

**Figure S7.** IR spectrum of 3,4,5-tris(benzyloxy)benzoic acid.

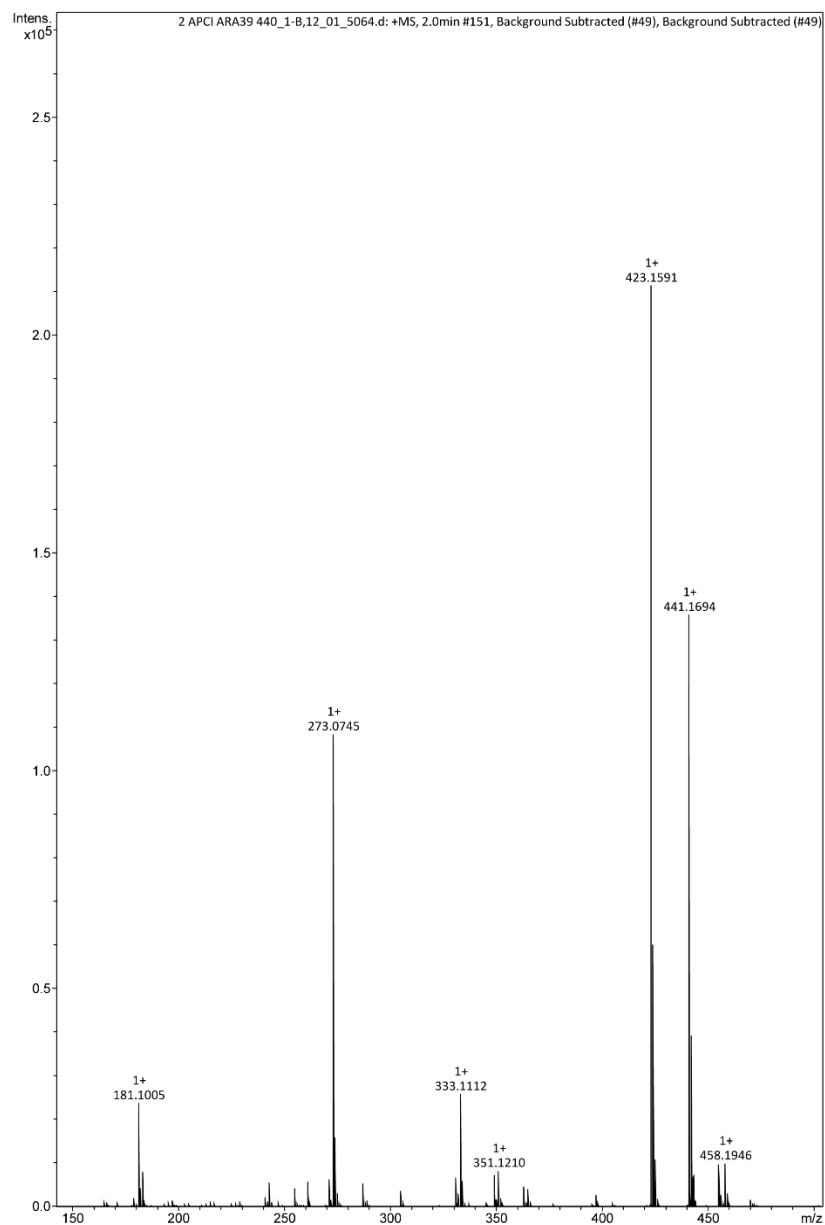

**Figure S8.** HR-MS of 3,4,5-tris(benzyloxy)benzoic acid.

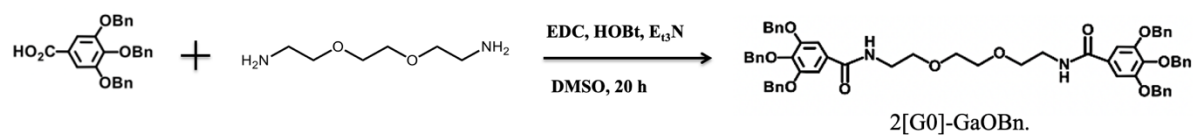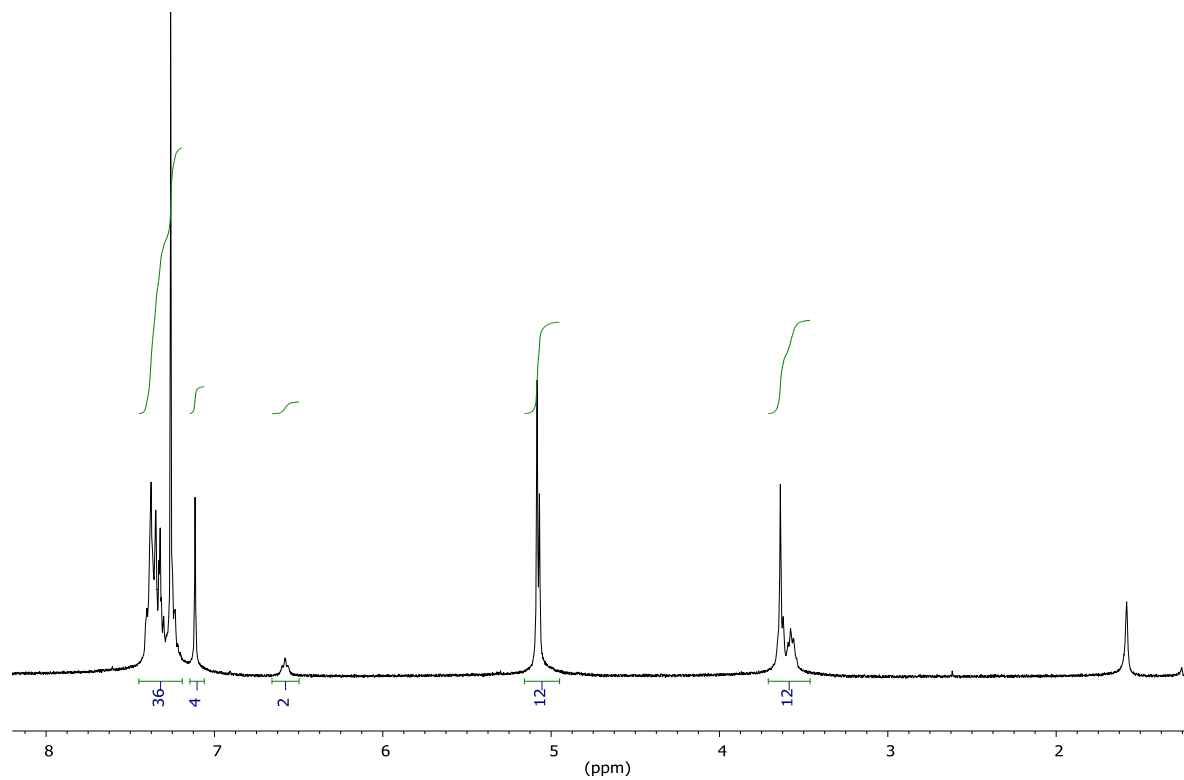

**Figure S9.** <sup>1</sup>H NMR spectrum (CDCl<sub>3</sub>) of 2[G0]-GaOBn.

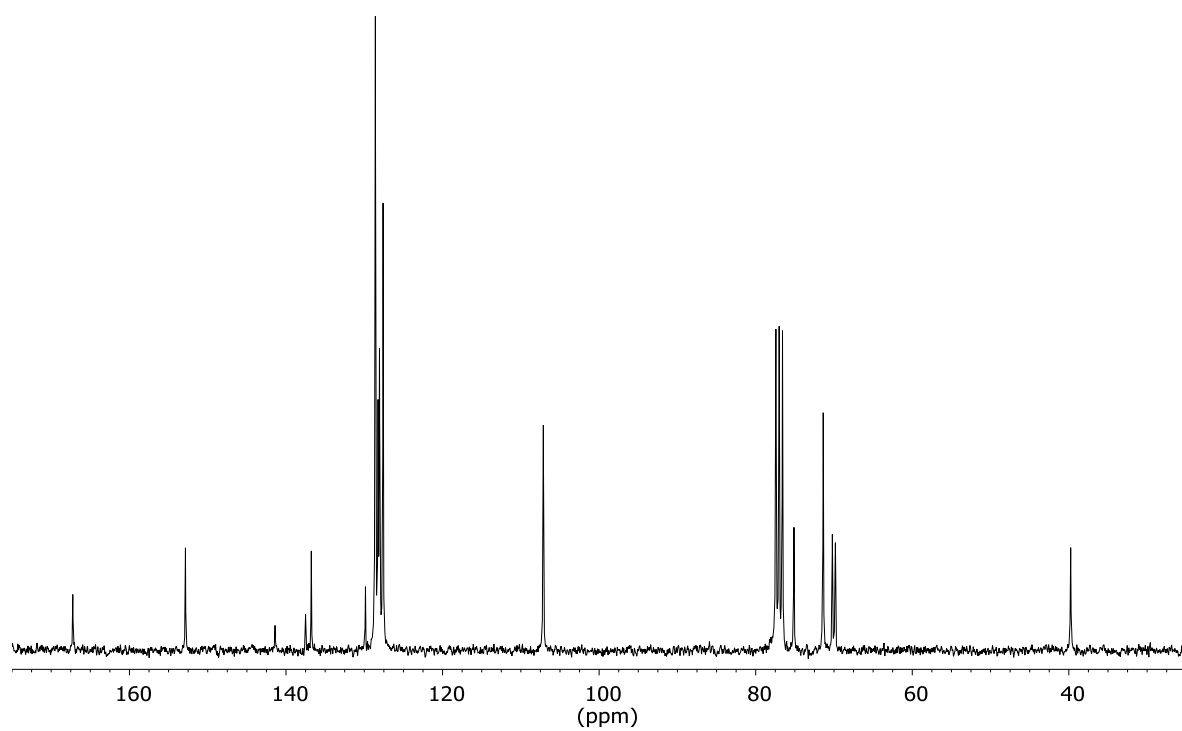

**Figure S10.**  $^{13}\text{C}$  NMR spectrum ( $\text{CDCl}_3$ ) of 2[G0]-GaOBn.

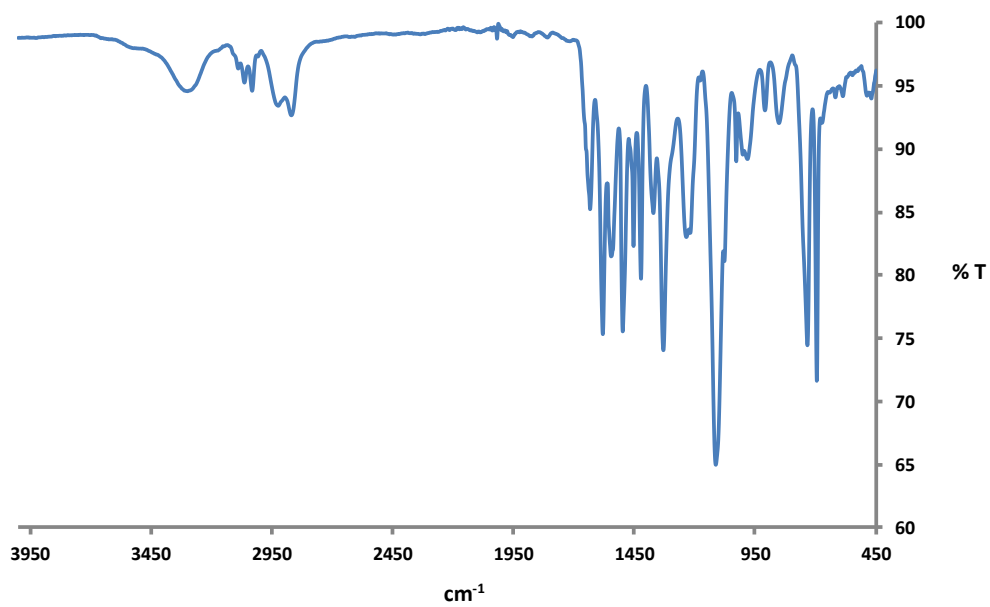

*Figure S11.* IR spectrum of 2[G0]-GaOBn.

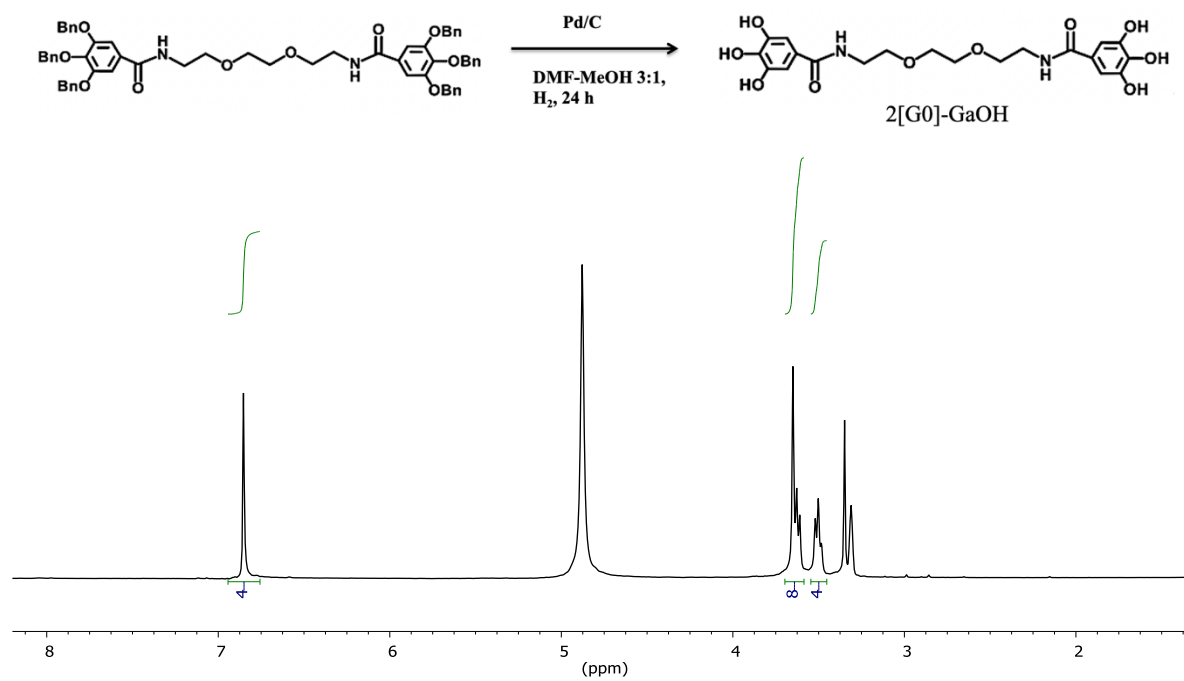

**Figure S12.** <sup>1</sup>H NMR spectrum (CD<sub>3</sub>OD) of 2[G0]-GaOH.



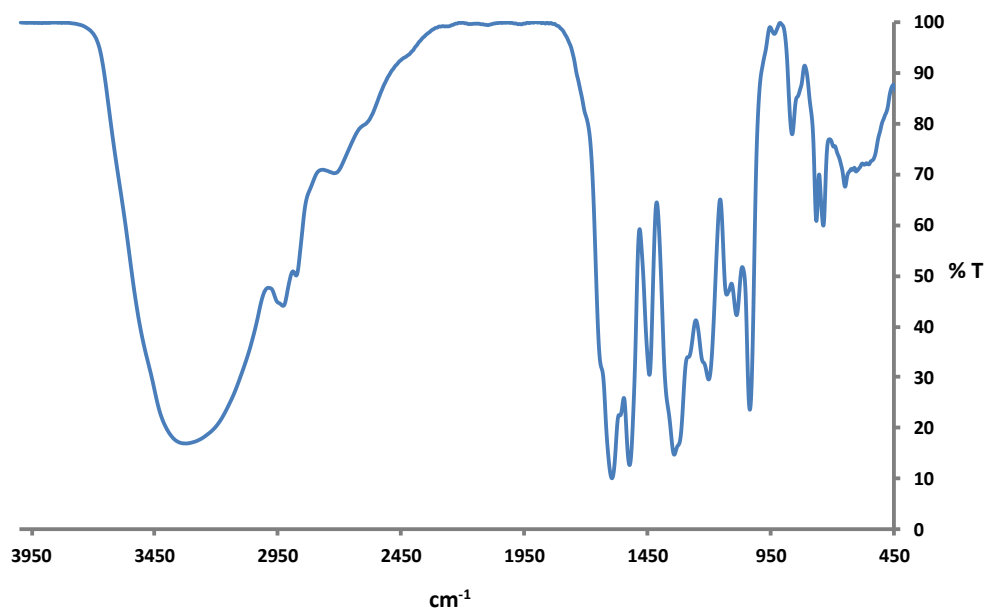

*Figure S13.* IR spectrum of 2[G0]-GaOH.

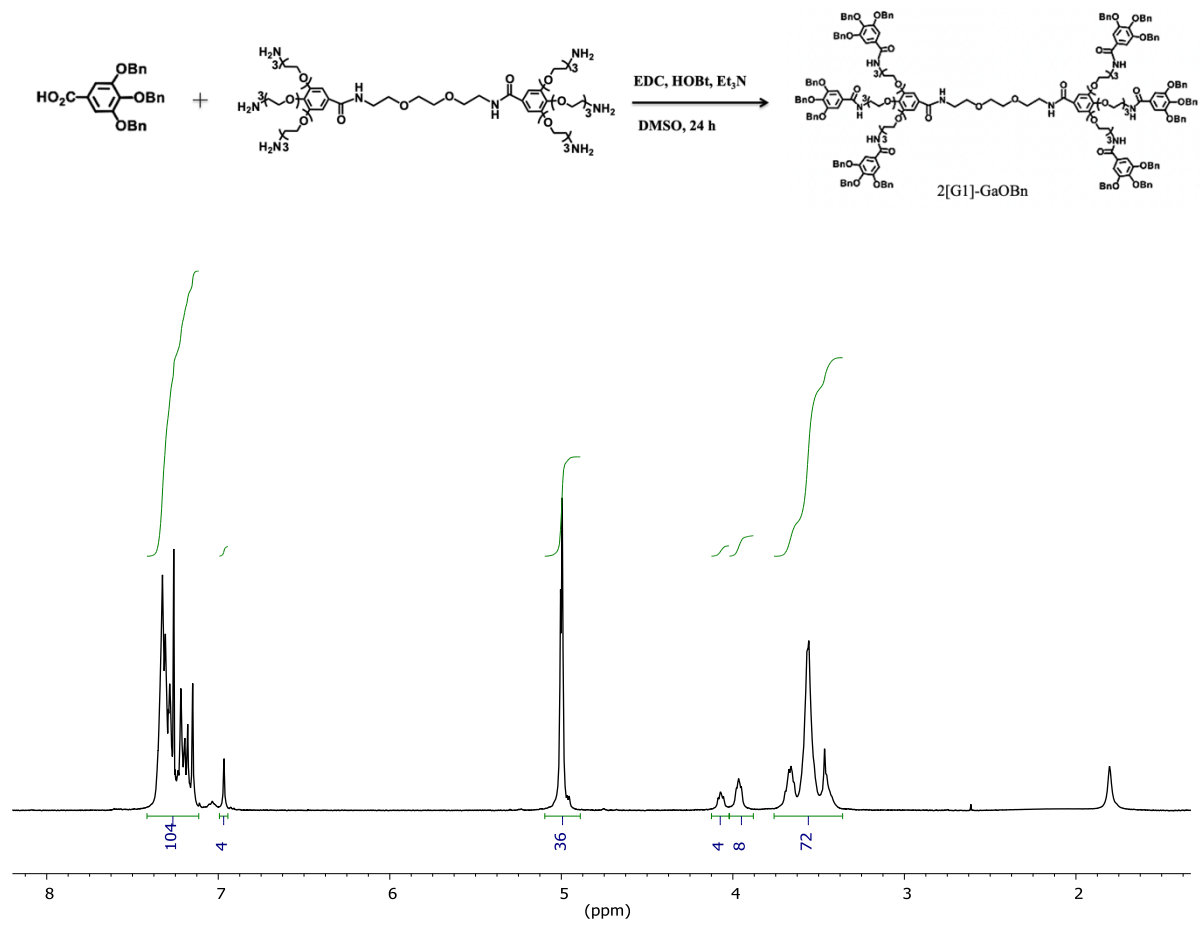

**Figure S14.** <sup>1</sup>H NMR spectrum (CDCl<sub>3</sub>) of 2[G1]-GaOBn.

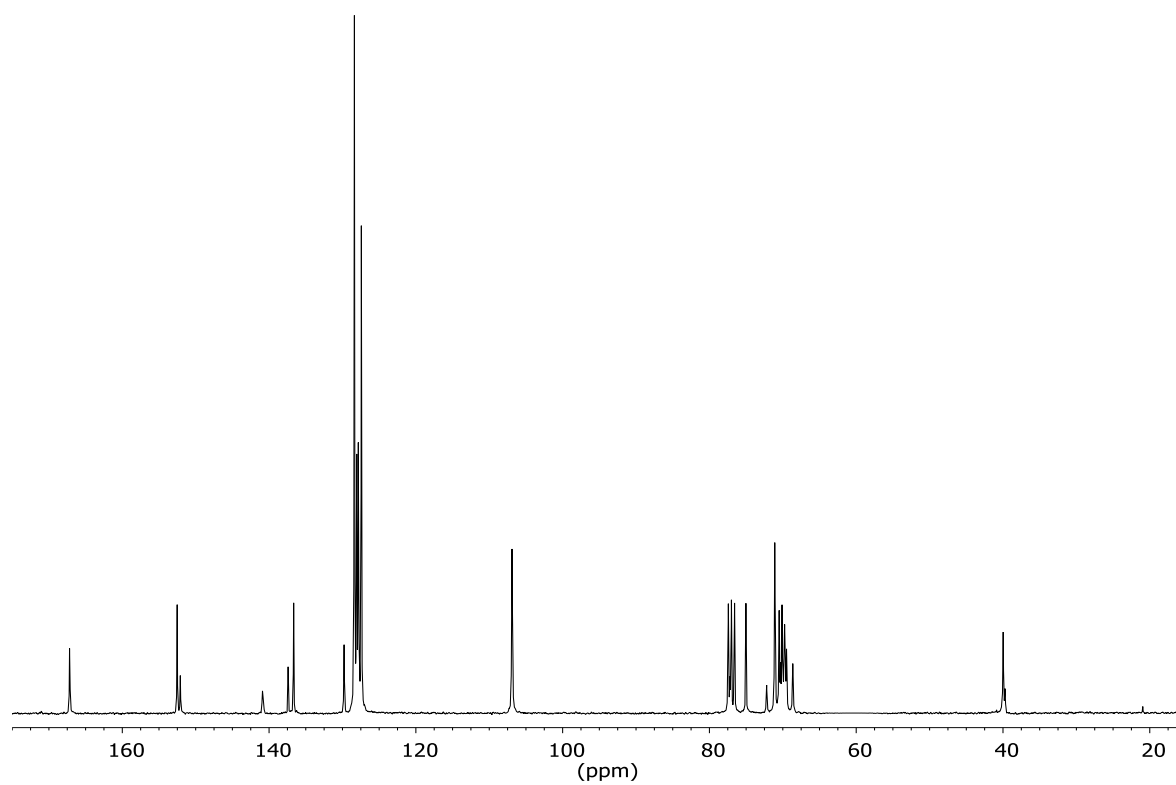

**Figure S15.**  $^{13}\text{C}$  NMR spectrum ( $\text{CDCl}_3$ ) of 2[G1]-GaOBn.

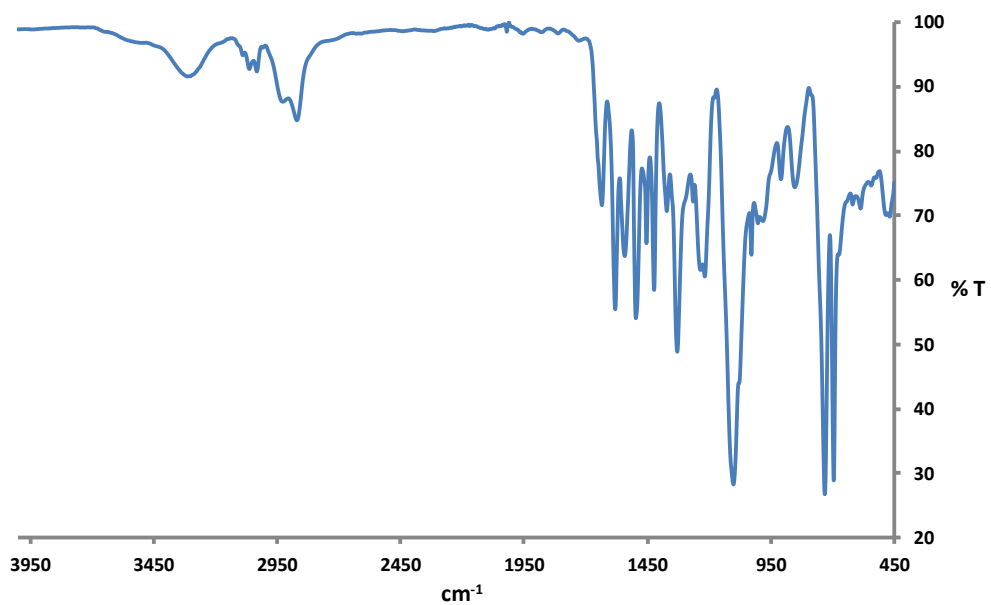

*Figure S16.* IR spectrum of 2[G1]-GaOBn.

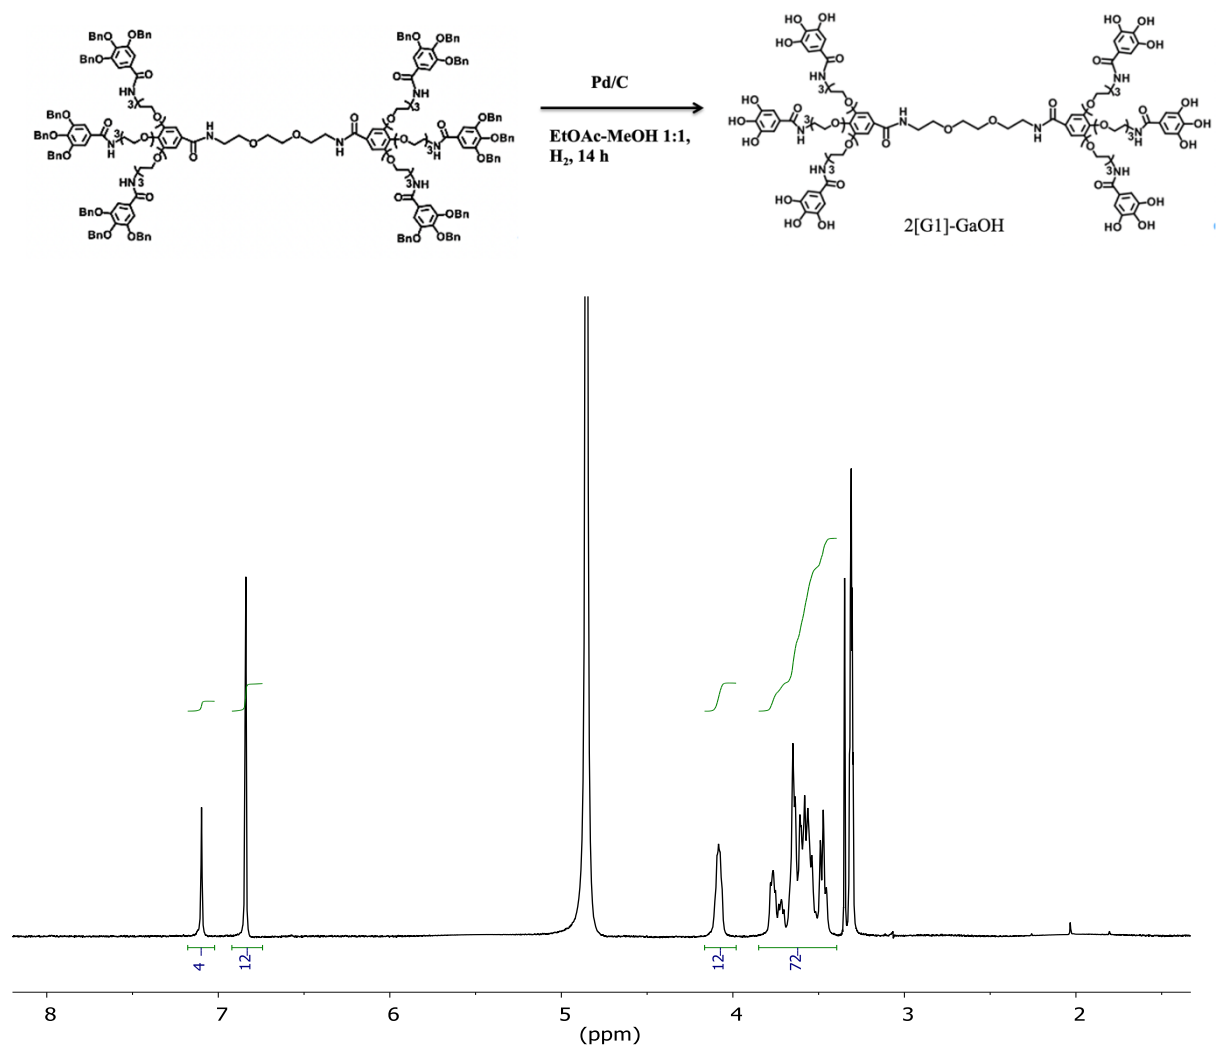

**Figure S17.** <sup>1</sup>H NMR spectrum (CD<sub>3</sub>OD) of 2[G1]-GaOH.

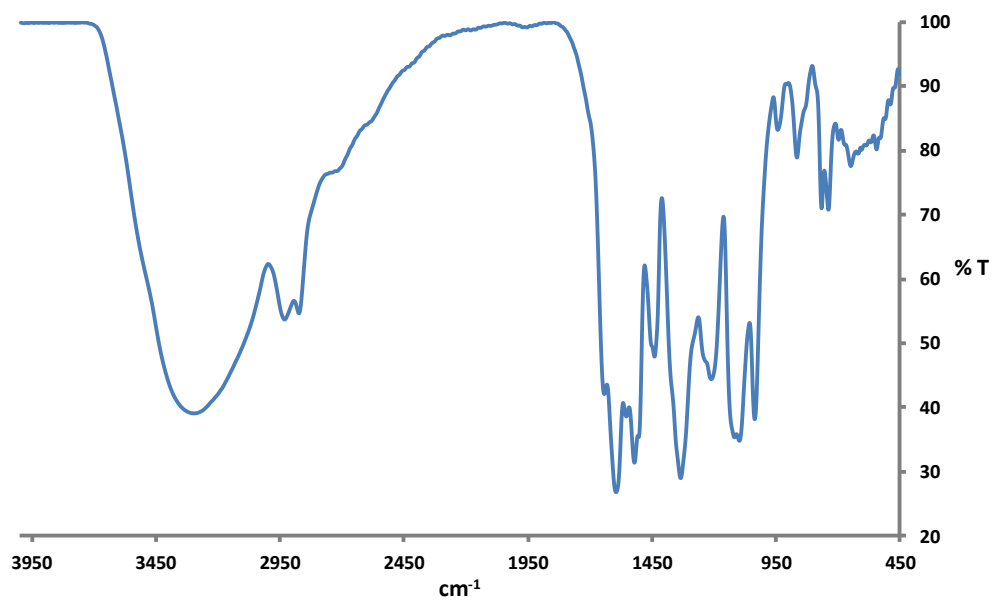

**Figure S18.** IR spectrum of 2[G1]-GaOH.

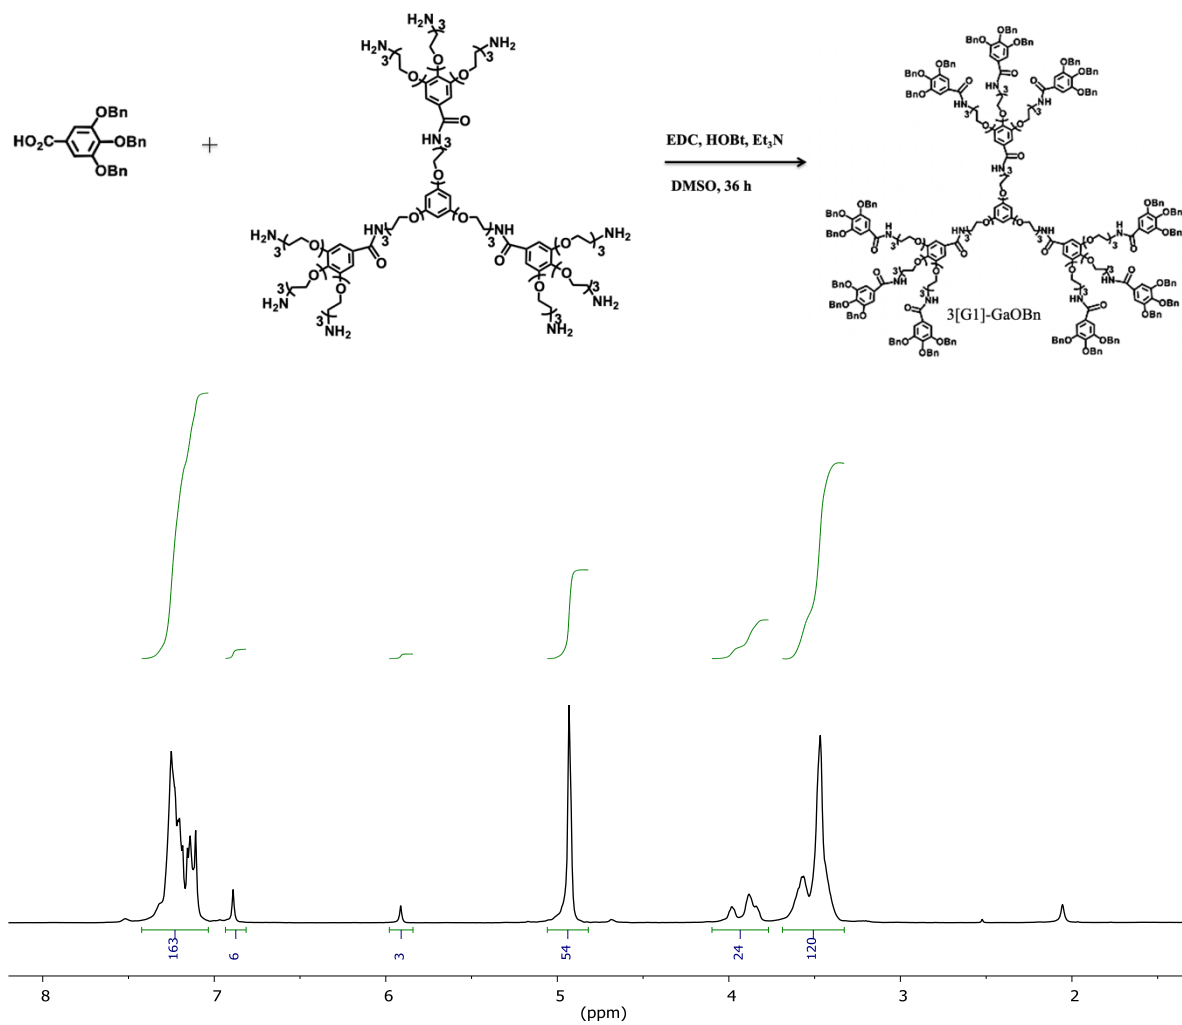

**Figure S19.** <sup>1</sup>H NMR spectrum (CDCl<sub>3</sub>) of 3[G1]-GaOBn.

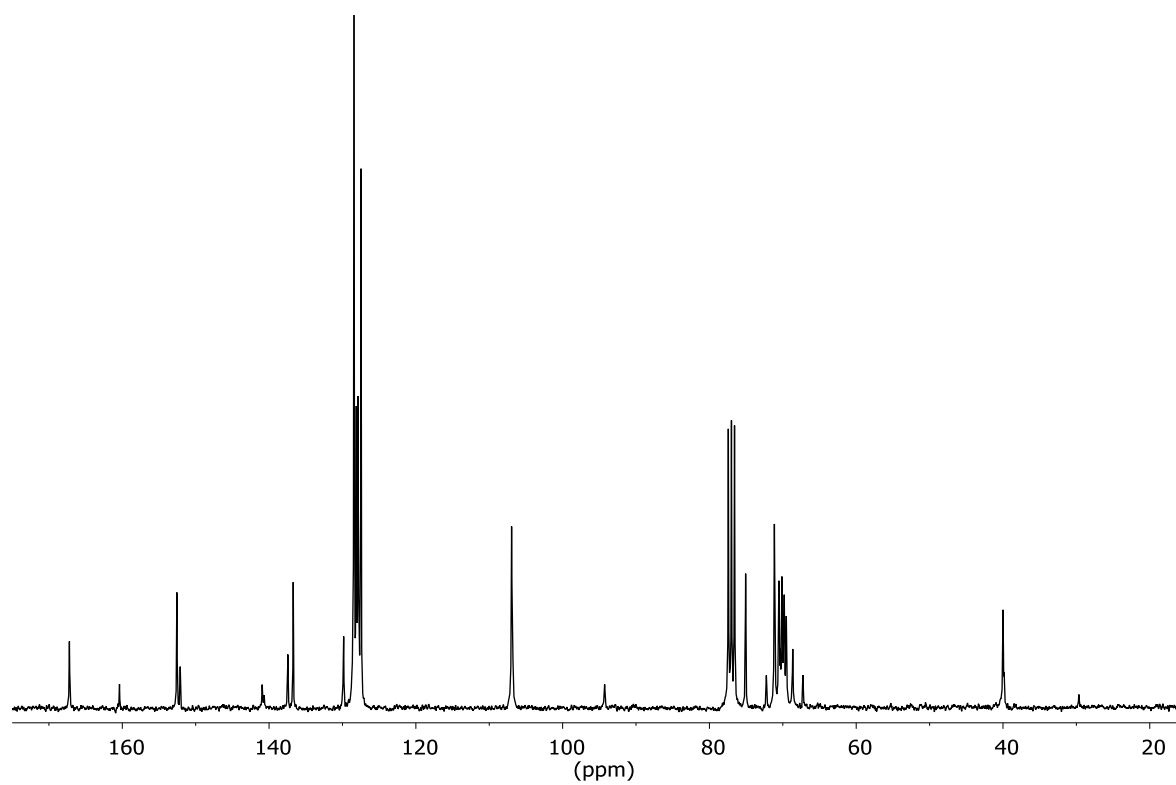

**Figure S20.**  $^{13}\text{C}$  NMR spectrum ( $\text{CDCl}_3$ ) of 3[G1]-GaOBn.



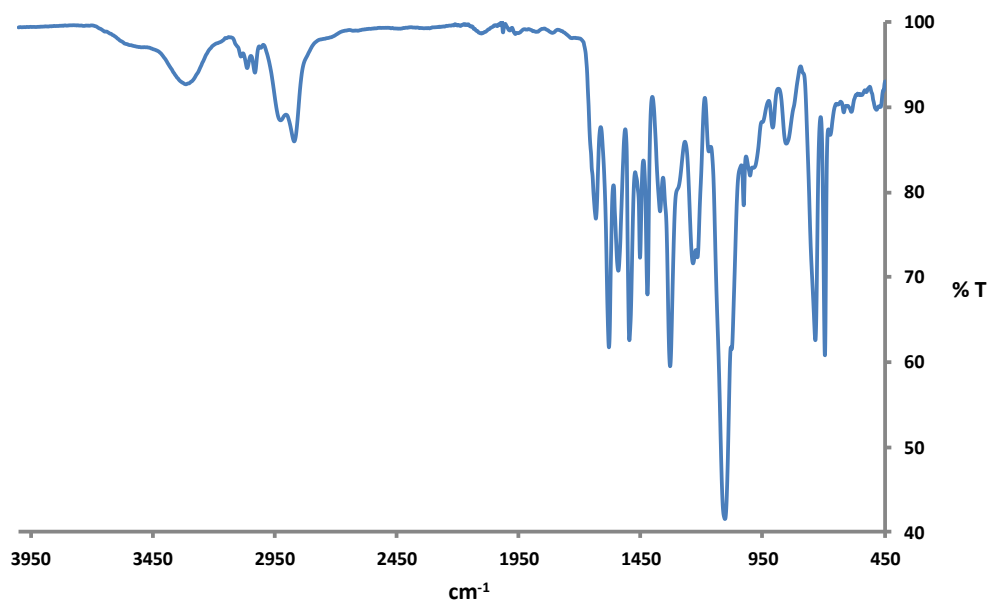

*Figure S21.* IR spectrum of 3[G1]-GaOBn.

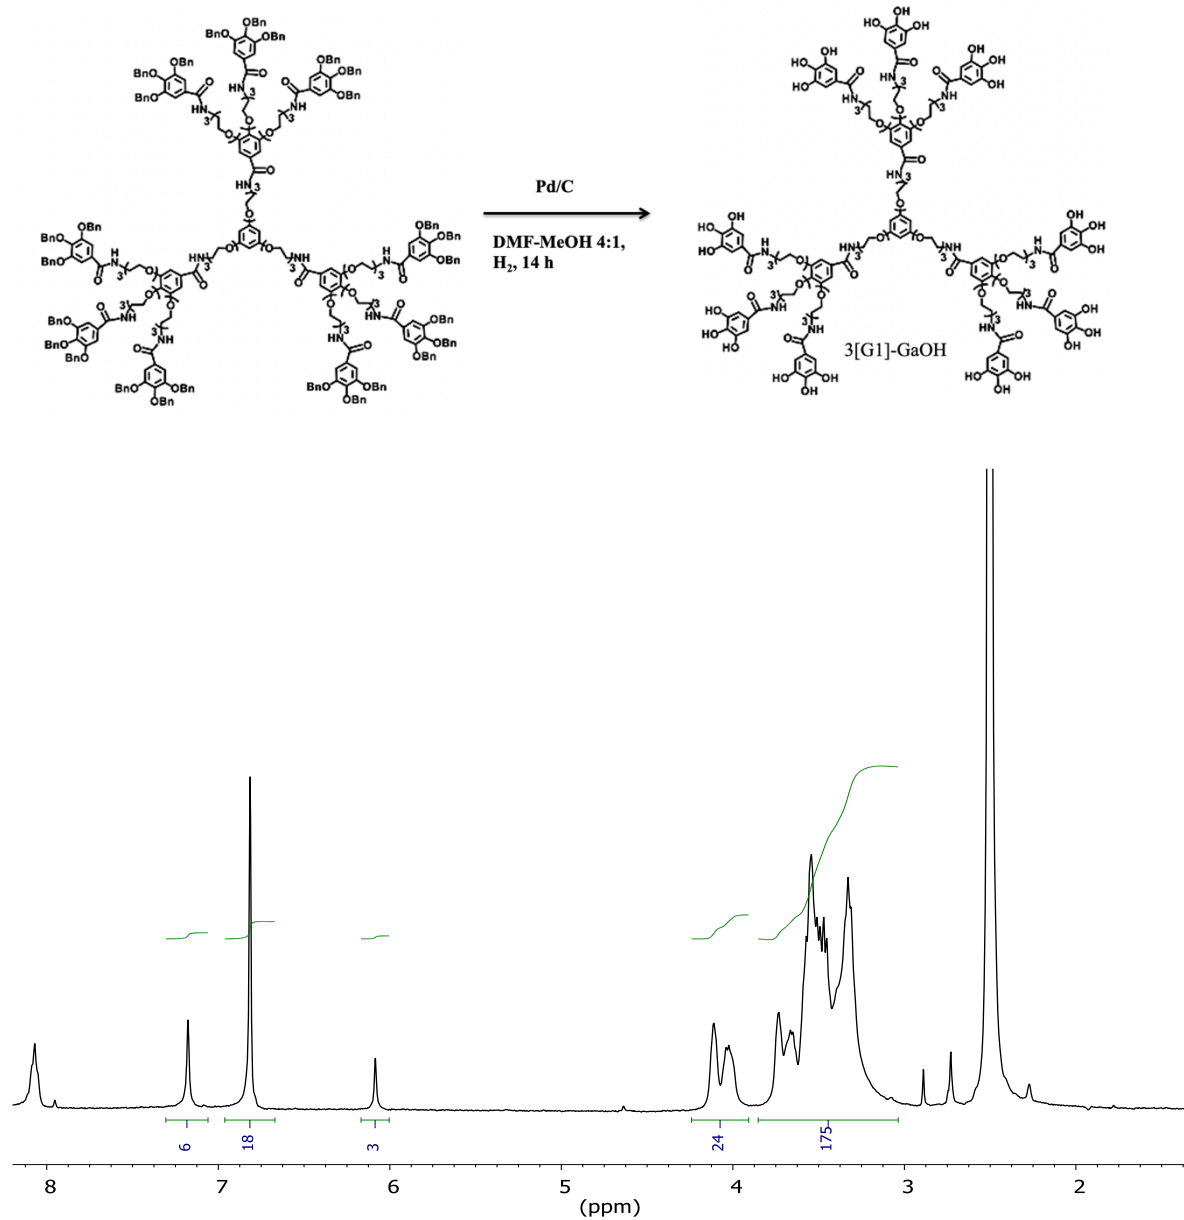

**Figure S22.** <sup>1</sup>H NMR spectrum (DMSO-d<sub>6</sub>) of 3[G1]-GaOH.

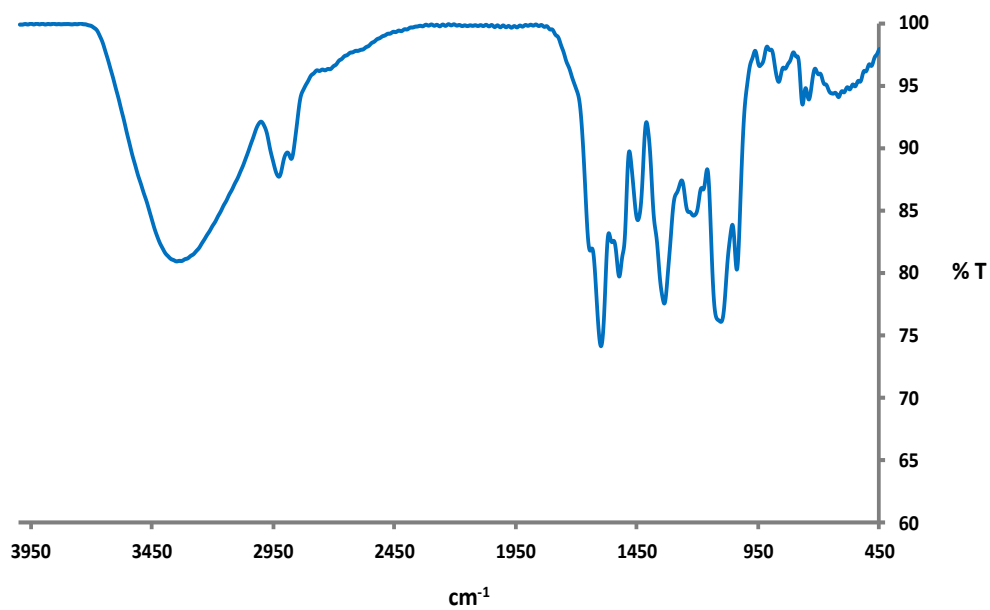

**Figure S23.** IR spectrum of 3[G1]-GaOH.

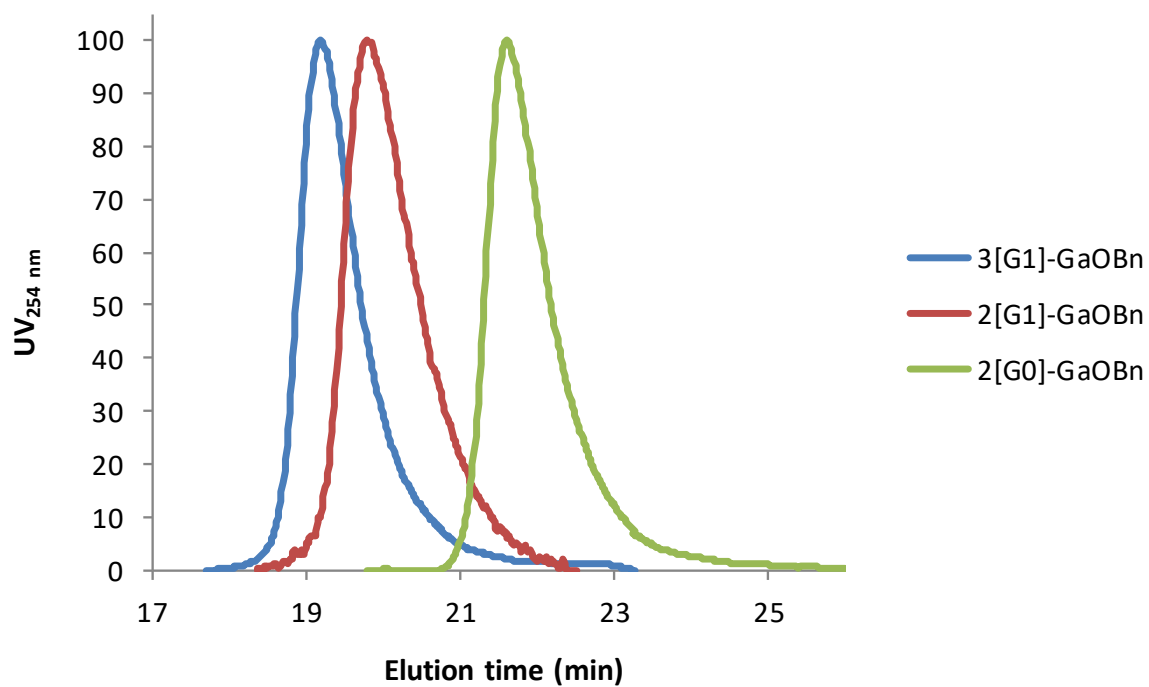

**Figure S24.** GPC elugrams of x[Gn]-GaOBn (THF).

## Interference of the dendrimers in the A $\beta$ supramolecular assembly

### Molecular dynamics simulations of the dendrimer-A $\beta$ interactions

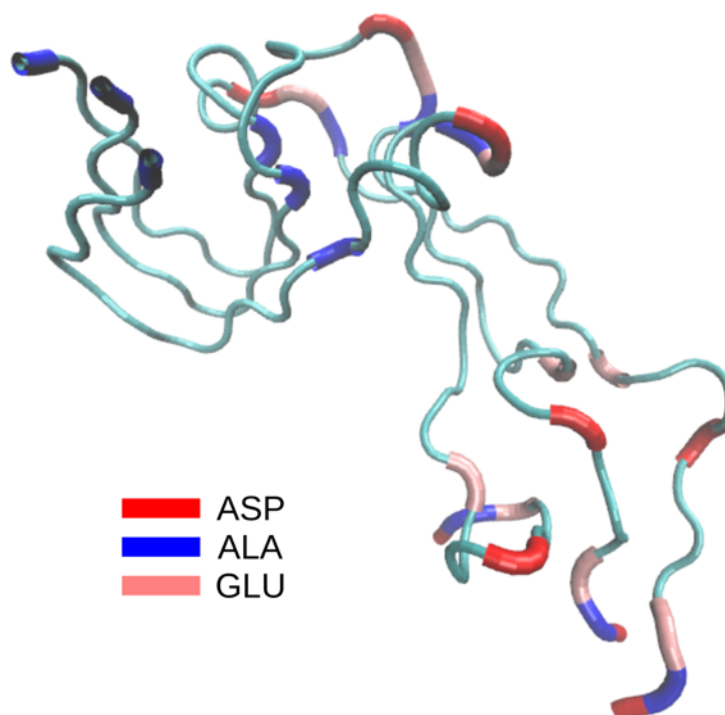

**Figure S25.** Optimized geometry from MD simulations of 2NAO model (full-length A $\beta$ f).

**Table S1.** MD simulation analysis of the interaction between full-length A $\beta$ f (2NAO pdb file) and dendrimers under a A $\beta$ f:dendrimers ratio of 1:1 showing the average number of H-bonds between the peptide chains of A $\beta$ f and the corresponding dendrimer, as well as the solvent-accessible surface area (SASA) of the region where dendrimers are interacting.

| <b>Disassembly<br/>1:1</b> | <b>Net H-Bond<br/>(number #)</b> | <b>SASA<br/>(nm<sup>2</sup>)</b> |
|----------------------------|----------------------------------|----------------------------------|
| <b>2NAO</b>                | --                               | 145 $\pm$ 4                      |
| <b>2NAO - Ga</b>           | 23 $\pm$ 3                       | 141 $\pm$ 4                      |
| <b>2NAO - 2G0-GaOH</b>     | 29 $\pm$ 3                       | 147 $\pm$ 5                      |
| <b>2NAO - 2G1-GaOH</b>     | 45 $\pm$ 4                       | 153 $\pm$ 4                      |
| <b>2NAO - 3G1-GaOH</b>     | 64 $\pm$ 4                       | 113 $\pm$ 3                      |

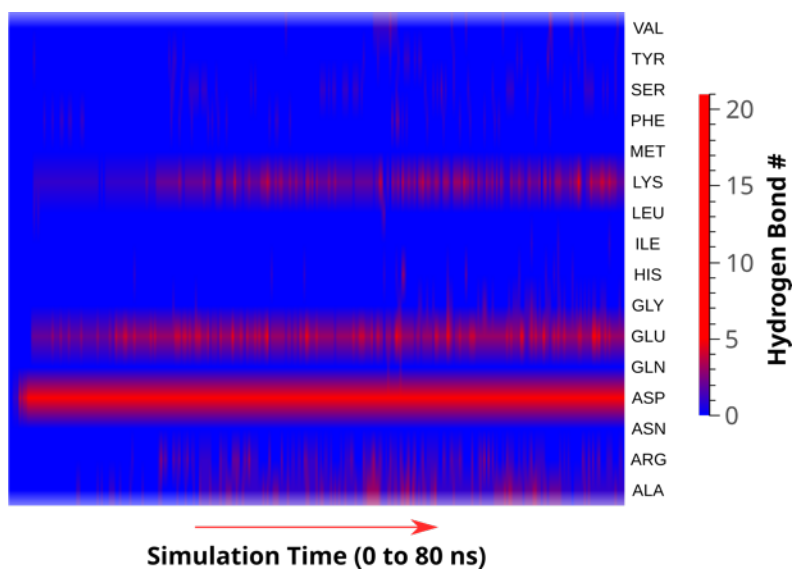

**Figure S26.** Dynamic interaction energy between full-length A $\beta_f$  (2NAO pdb file) and Ga (1:1 ratio). Preferential binding residues were calculated by the nonbonded interaction energy and the number of H-bonds between each A $\beta_f$  and Ga.

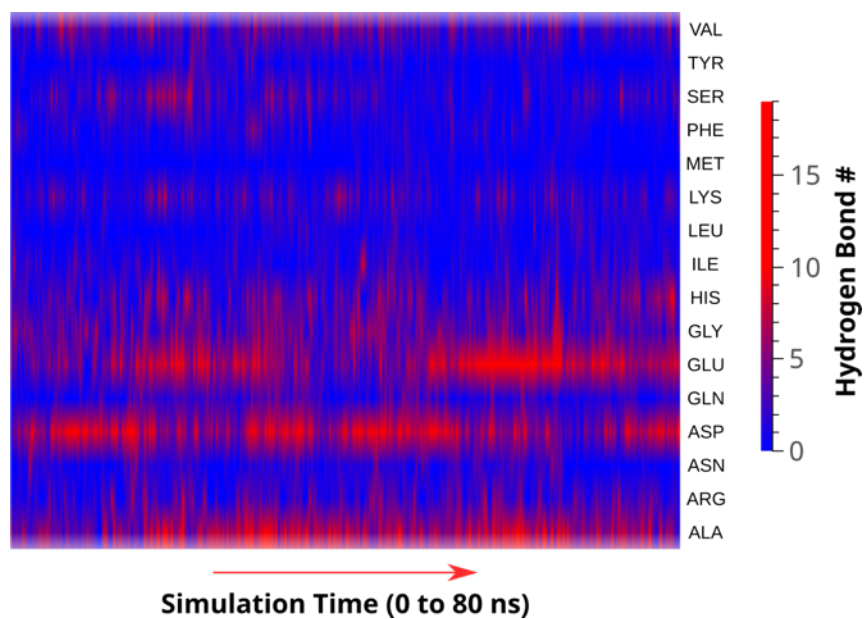

**Figure S27.** Dynamic interaction energy between full-length A $\beta_f$  (2NAO pdb file) and 2G0-GaOH (1:1 ratio). Preferential binding residues were calculated by the nonbonded interaction energy and the number of H-bonds between each full-length A $\beta_f$  and 2G0-GaOH.

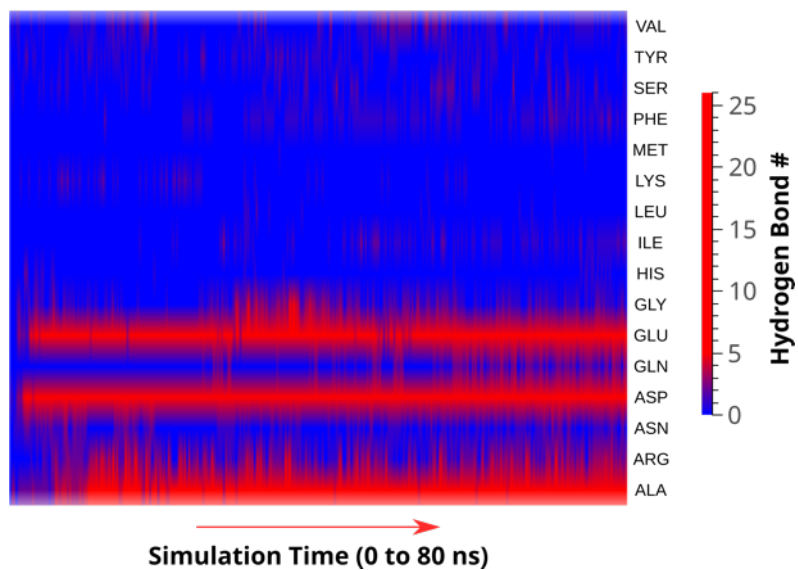

**Figure S28.** Dynamic interaction energy between full-length A $\beta_f$  (2NAO pdb file) and 2G1-GaOH (1:1 ratio). Preferential binding residues were calculated by the nonbonded interaction energy and the number of H-bonds between each full-length A $\beta_f$  and 2G1-GaOH.

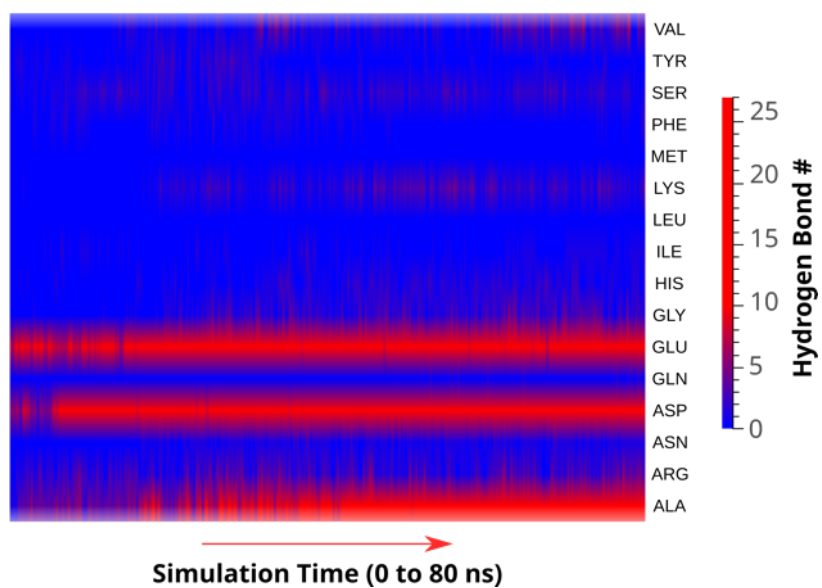

**Figure S29.** Dynamic interaction energy between full-length A $\beta$ <sub>f</sub> (2NAO pdb file) and 3G1-GaOH (1:1 ratio). Preferential binding residues were calculated by the nonbonded interaction energy and the number of H-bonds between each full-length A $\beta$ <sub>f</sub> and 3G1-GaOH.



## Thioflavin T (ThT) assay

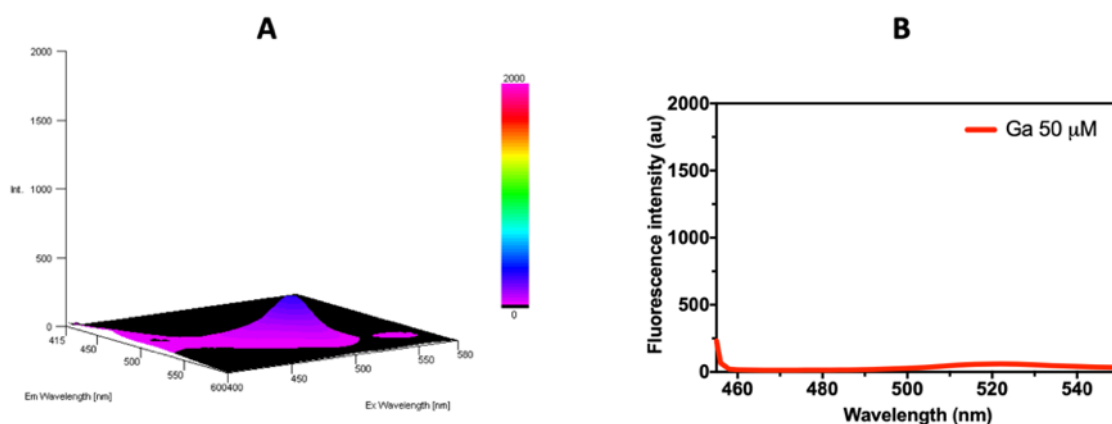

**Figure S30.** (A) 3D fluorescence spectra of Gallic acid (Ga, 50 $\mu$ M) using the following acquisition parameters:  $\lambda_{\text{ex}} = 400\text{-}580$  nm;  $\lambda_{\text{em}} = 415\text{-}600$  nm; (B) Fluorescence spectrum of Ga (50 $\mu$ M) acquired using a  $\lambda_{\text{ex}} = 435$  nm and a  $\lambda_{\text{em}} = 445\text{-}600$  nm; excitation bandwidth = 5nm; emission bandwidth = 10nm; response = 2s.

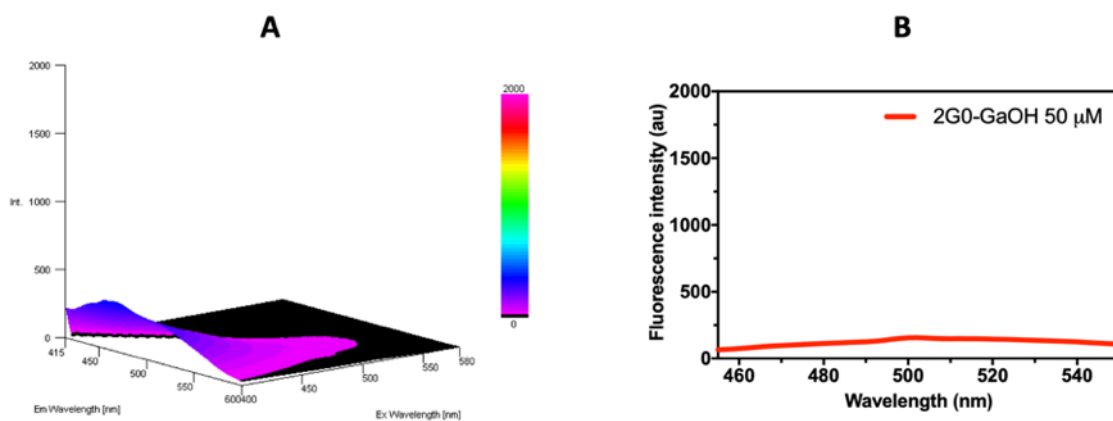

**Figure S31.** (A) 3D fluorescence spectra of 2G0-GaOH (50 $\mu$ M) using the following acquisition parameters:  $\lambda_{\text{ex}} = 400\text{-}580$  nm;  $\lambda_{\text{em}} = 415\text{-}600$  nm; (B) Fluorescence spectrum of 2G0-GaOH (50 $\mu$ M) acquired using a  $\lambda_{\text{ex}} = 435$  nm and a  $\lambda_{\text{em}} = 445\text{-}600$  nm; excitation bandwidth = 5nm; emission bandwidth = 10nm; response = 2s.

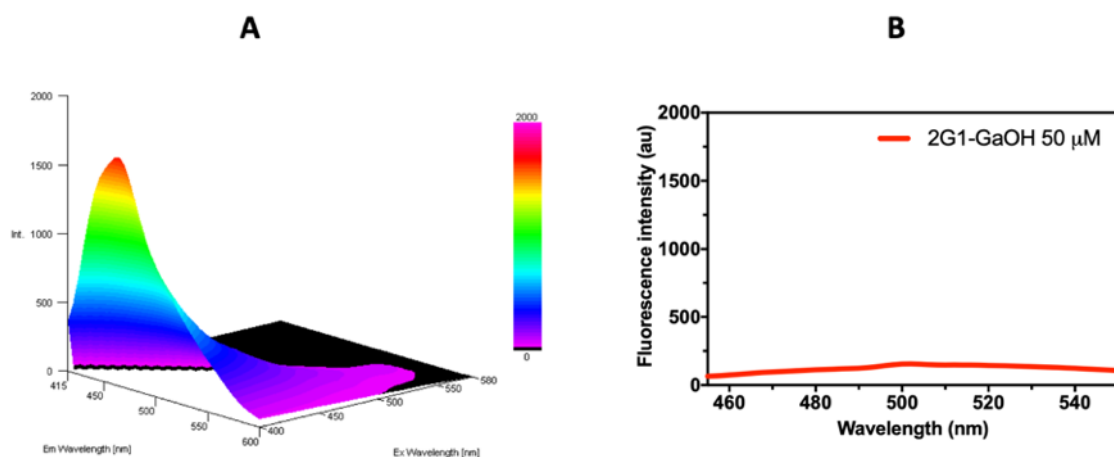

**Figure S32.** (A) 3D fluorescence spectra of 2G1-GaOH (50 $\mu$ M) using the following acquisition parameters:  $\lambda_{\text{ex}} = 400\text{-}580$  nm;  $\lambda_{\text{em}} = 415\text{-}600$  nm; (B) Fluorescence spectrum of 2G1-GaOH (50 $\mu$ M) acquired using a  $\lambda_{\text{ex}} = 435$  nm and a  $\lambda_{\text{em}} = 445\text{-}600$  nm; excitation bandwidth = 5nm; emission bandwidth = 10nm; response = 2s.

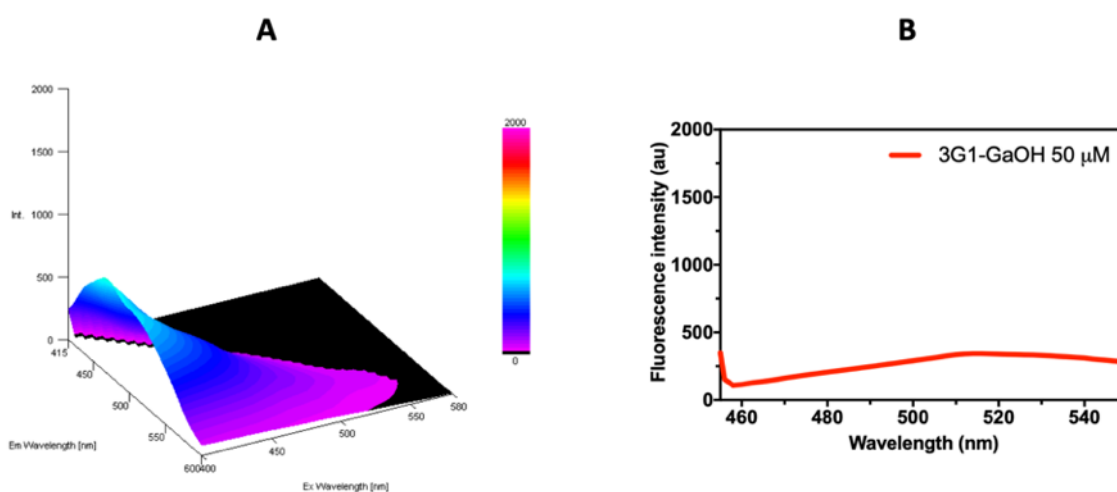

**Figure S33.** (A) 3D fluorescence spectra of 3G1-GaOH (50 $\mu$ M) using the following acquisition parameters:  $\lambda_{\text{ex}} = 400\text{-}580$  nm;  $\lambda_{\text{em}} = 415\text{-}600$  nm; (B) Fluorescence spectrum of 3G1-GaOH (50 $\mu$ M) acquired using a  $\lambda_{\text{ex}} = 435$  nm and a  $\lambda_{\text{em}} = 445\text{-}600$  nm; excitation bandwidth = 5nm; emission bandwidth = 10nm; response = 2s.

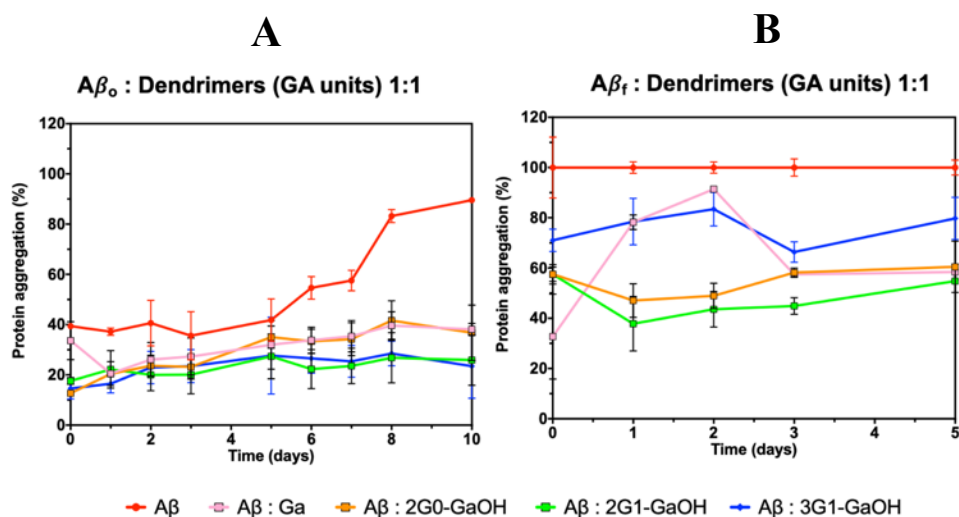

**Figure S34.** (A) Multivalent inhibition of the Aβ<sub>0</sub> aggregation kinetics evaluated using the ThT assay. Ga, 2G0-GaOH, 2G1-GaOH and 3G1-GaOH inhibited the Aβ fibril elongation at an Aβ:Ga molar ratio of 1:1. Dendrimers were mixed with Aβ<sub>0</sub> in the lag-phase of the Aβ fibril formation and fluorescence was measured over 10 days. All experiments were performed at room temperature. (B) Multivalent disassembling of Aβ<sub>42</sub> fibrils evaluated using the ThT assay. Ga, 2G0-GaOH, 2G1-GaOH and 3G1-GaOH promoted the disassembly of Aβ fibrils at an Aβ:Ga molar ratio of 1:1. Compounds were mixed with Aβ<sub>42</sub> at the plateau phase and fluorescence was measured over 5 days. All experiments were performed at room temperature.

## Circular Dichroism (CD)

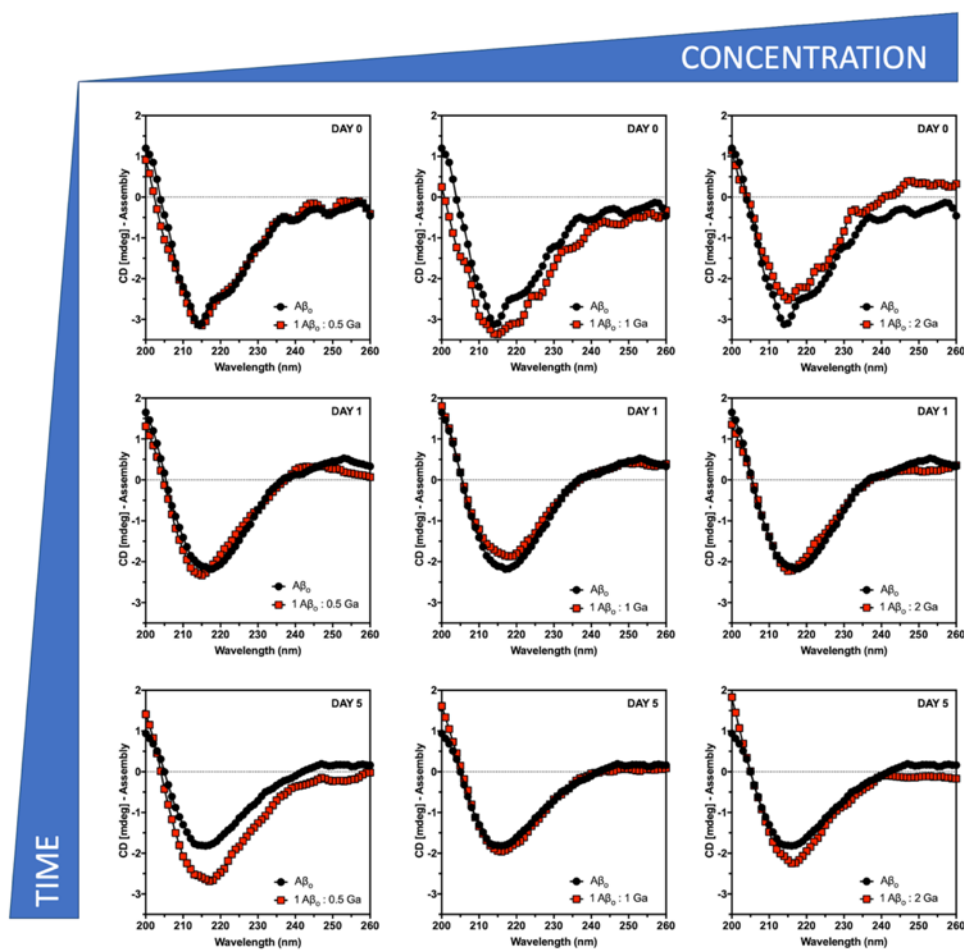

**Figure S35.** CD spectra of  $A\beta_0$  recorded for 5 days in the presence of different molar ratios of Ga. In all the cases, incubation was made at room temperature, under constant agitation.

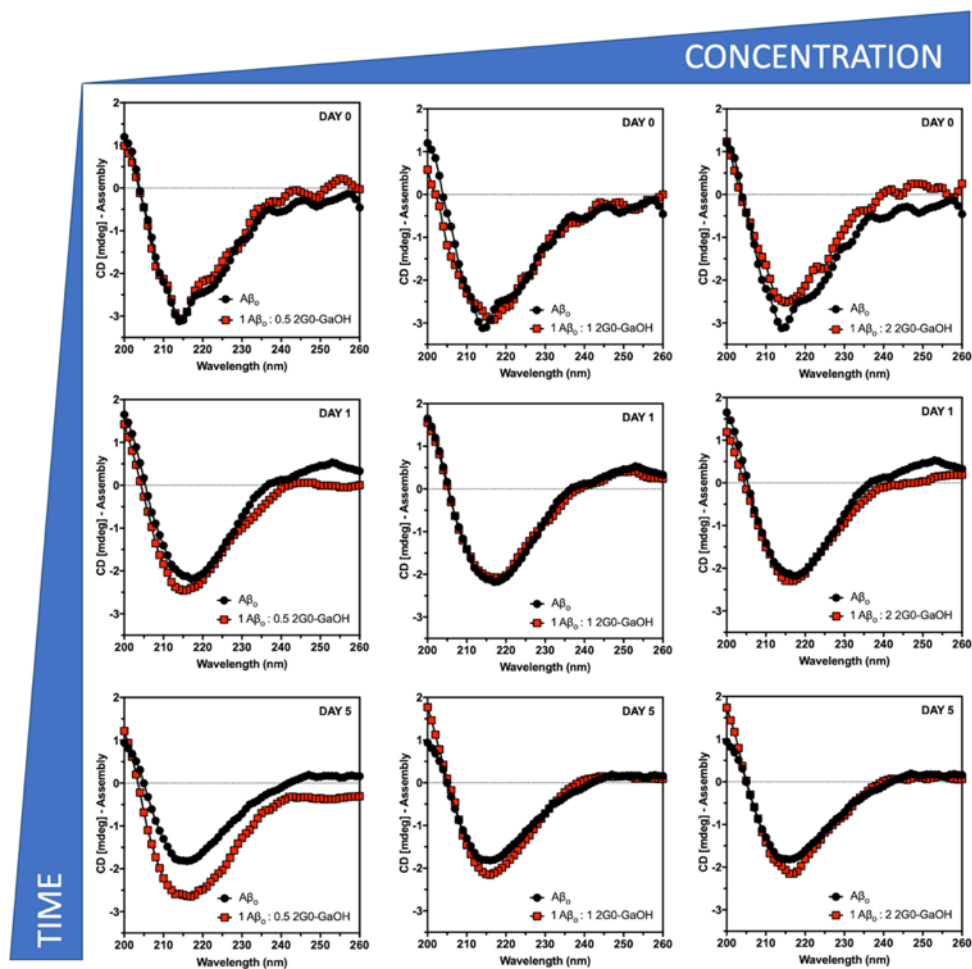

**Figure S36.** CD spectra of Aβ<sub>0</sub> recorded for 5 days in the presence of different molar ratios of 2G0-GaOH. In all the cases, incubation was made at room temperature, under constant agitation.

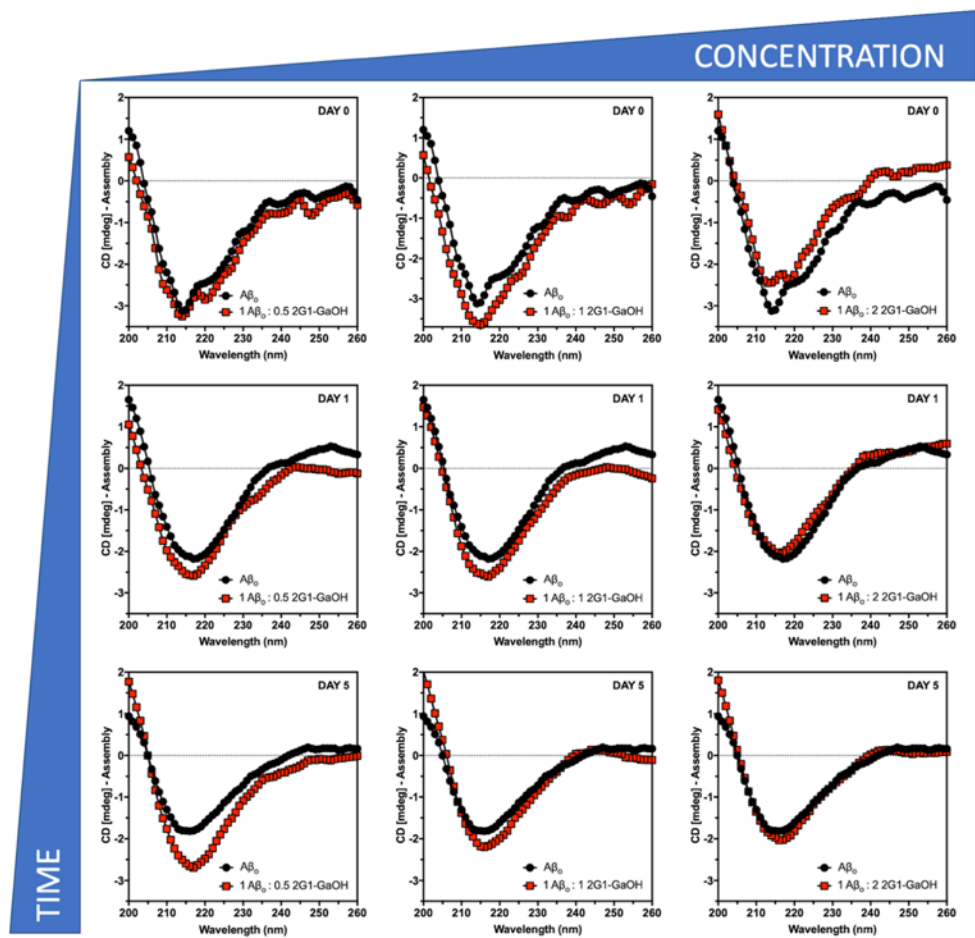

**Figure S37.** CD spectra of Aβ<sub>0</sub> recorded for 5 days in the presence of different molar ratios of 2G1-GaOH. In all the cases, incubation was made at room temperature, under constant agitation.

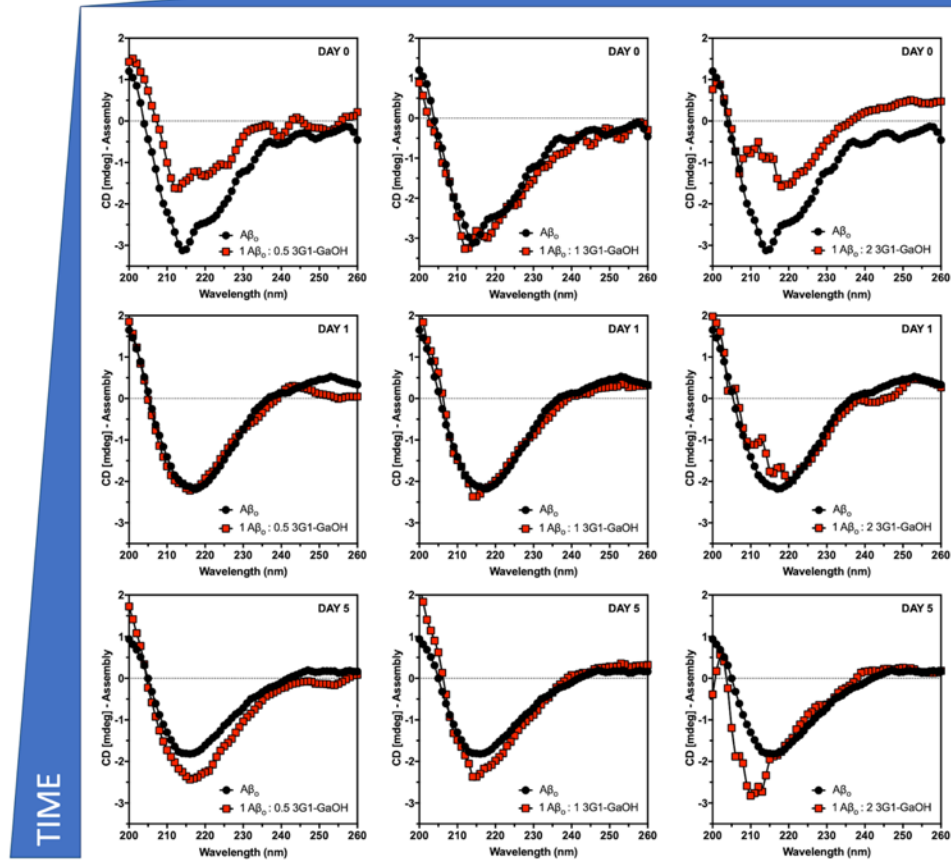

**Figure S38.** CD spectra of  $A\beta_0$  recorded for 5 days in the presence of different molar ratios of 3G1-GaOH. In all the cases, incubation was made at room temperature, under constant agitation.

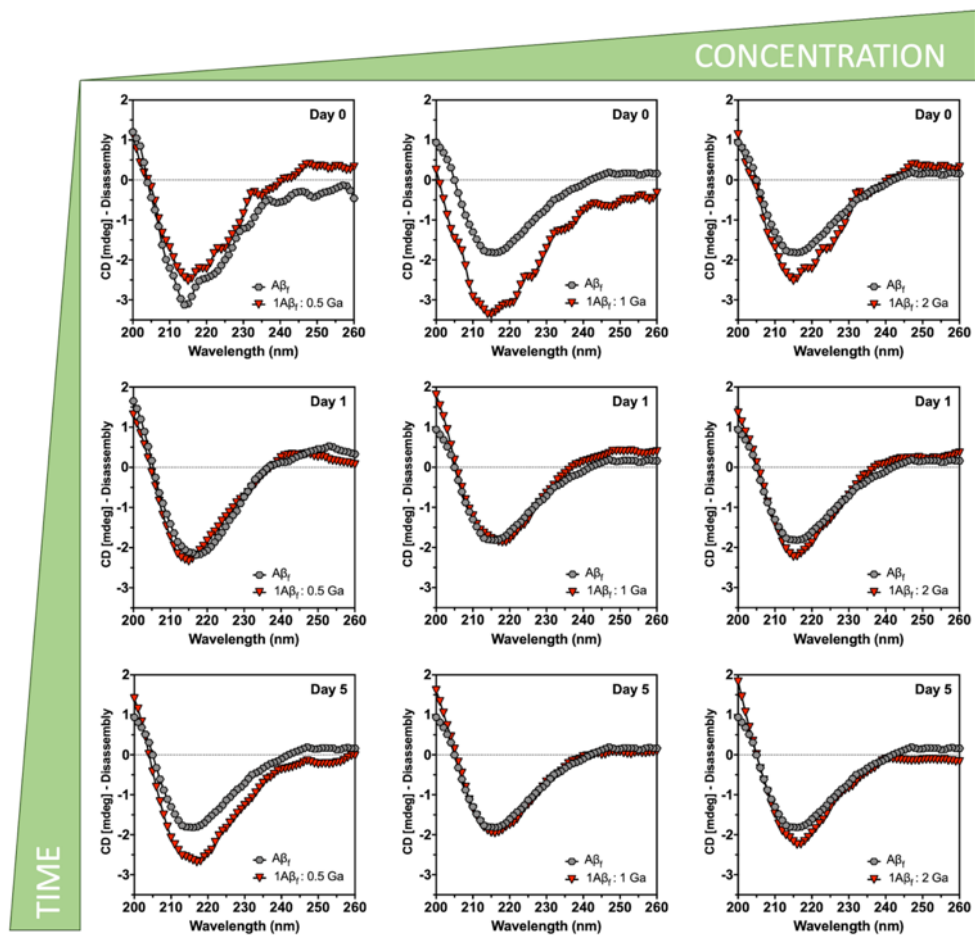

**Figure S39.** CD spectra of  $A\beta_f$  recorded for 5 days in the presence of different molar ratios of Ga. In all the cases, incubation was made at room temperature, under constant agitation.



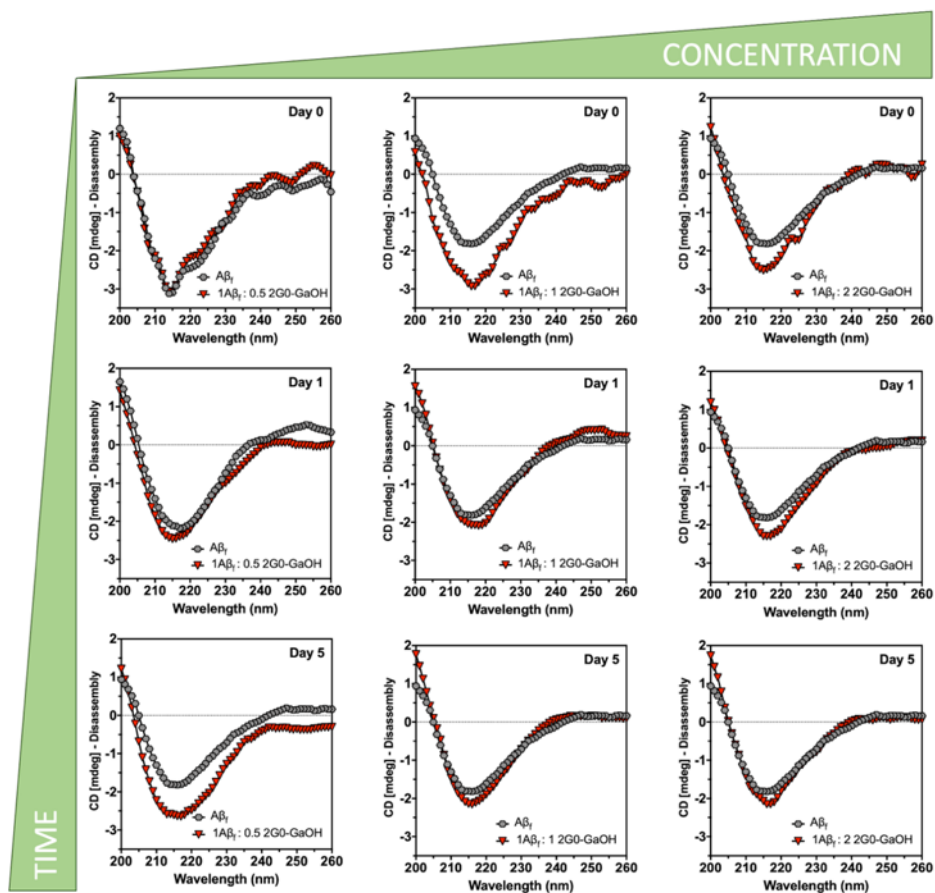

**Figure S40.** CD spectra of Aβ<sub>1</sub> recorded for 5 days in the presence of different molar ratios of 2G0-GaOH. In all the cases, incubation was made at room temperature, under constant agitation.

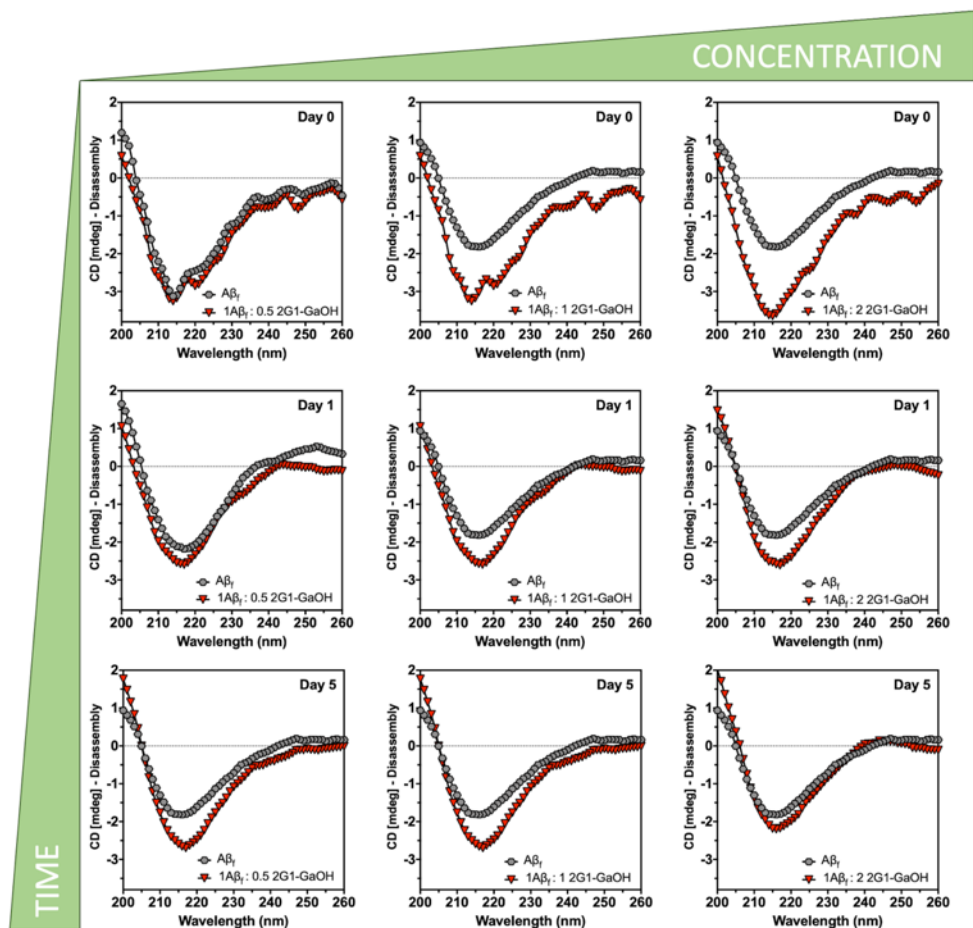

**Figure S41.** CD spectra of  $A\beta_f$  recorded for 5 days in the presence of different molar ratios of 2G1-GaOH. In all the cases, incubation was made at room temperature, under constant agitation.

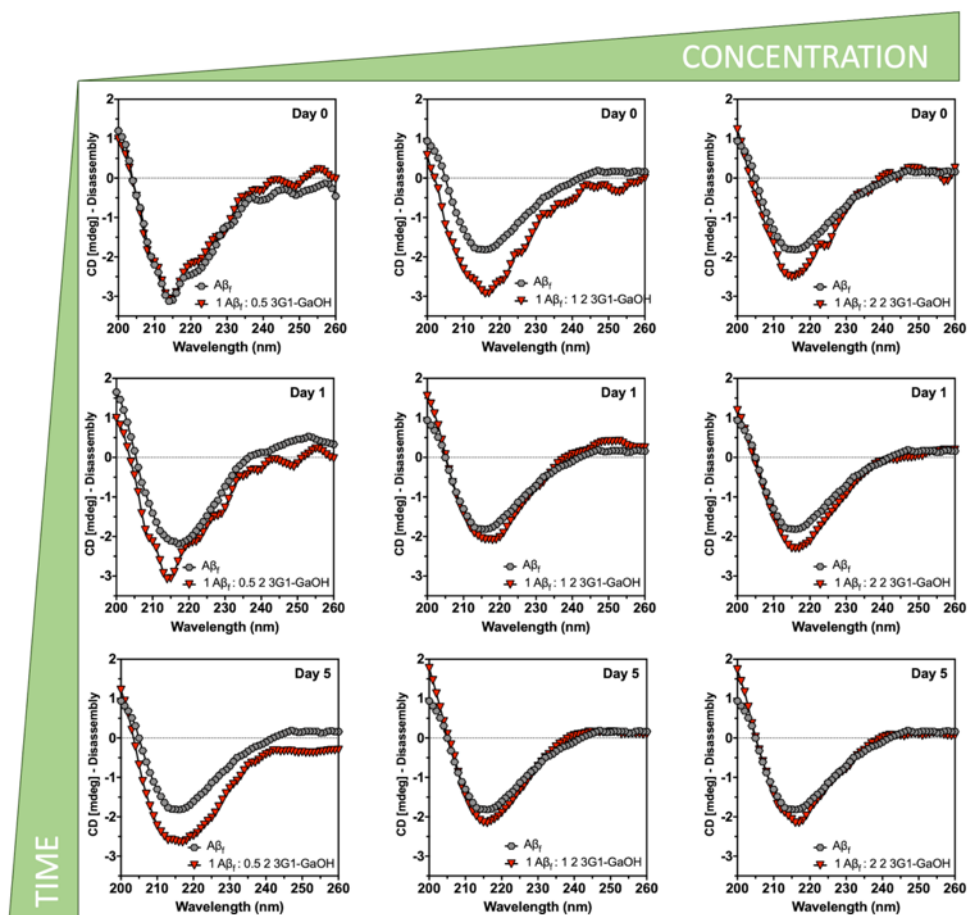

**Figure S42.** CD spectra of Aβ<sub>f</sub> recorded for 5 days in the presence of different molar ratios of 3G1-GaOH. In all the cases, incubation was made at room temperature, under constant agitation.

## $A\beta_o$ : Dendrimers (GA units) 1:1

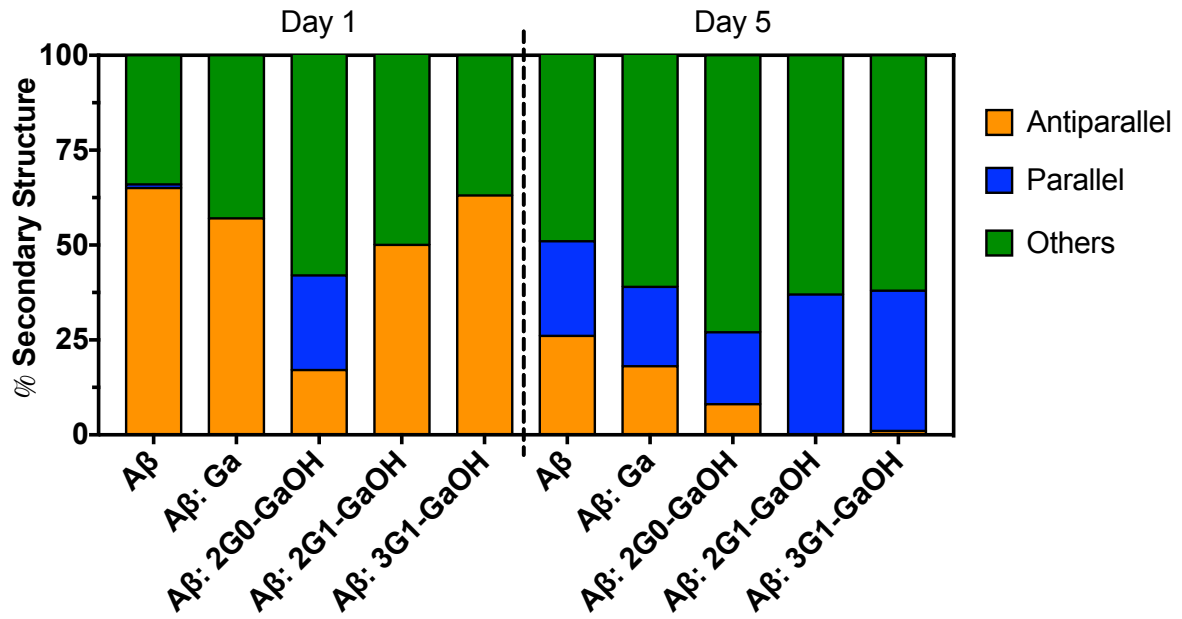

**Figure S43.** Loss of antiparallel  $\beta$ -sheets for the aggregation pathway ( $A\beta_o$ ) followed by CD during 1 and 5 days. All experiments were done using an  $A\beta$ :Ga molar ratio of 1:1;  $[A\beta]=25\mu\text{M}$ ; and under constant agitation at 37 °C. Error bars = SD; n = 3. CD data were fitted using BeStSel - RMSD: 1.0283; NRMSD: 0.04966.

## Scanning transmission electron microscopy (STEM)

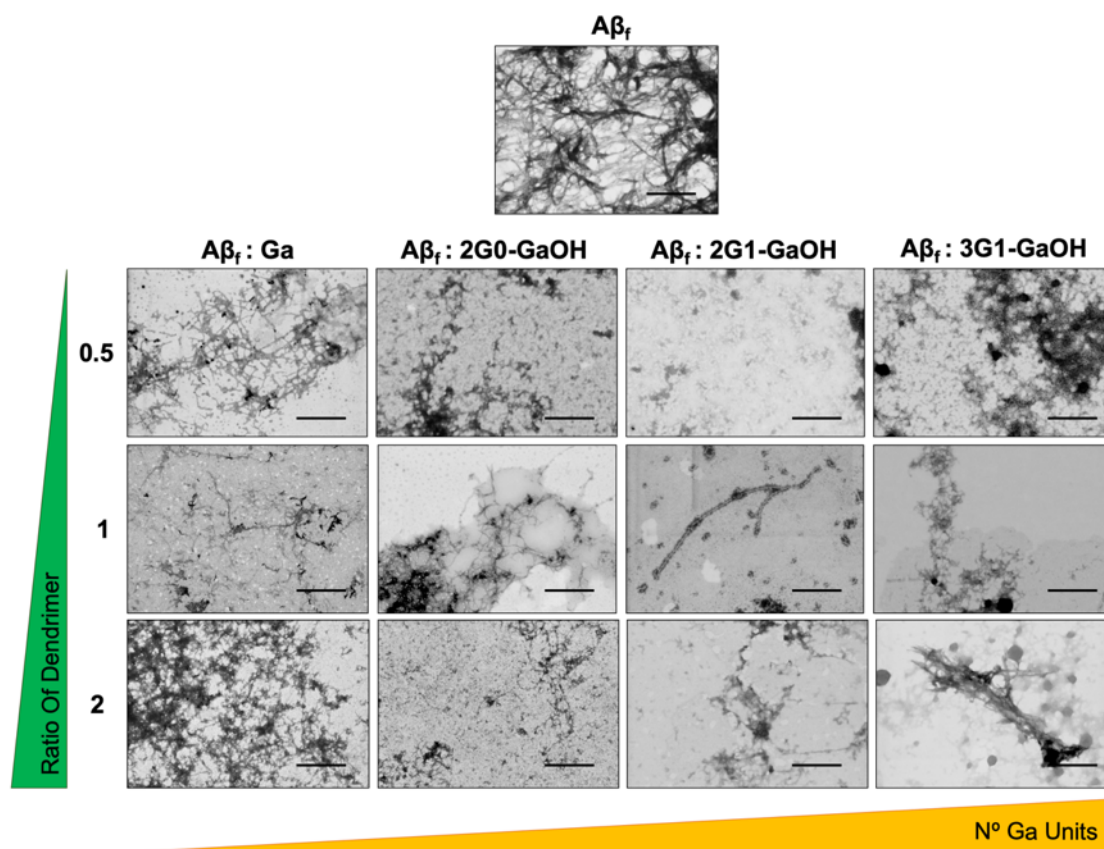

**Figure S44.** Representative STEM images of  $A\beta_f$  samples. Each dendrimer was added into an  $A\beta_f$  solution (under  $A\beta_f$ :dendrimer concentration ratios of 1:0.5, 1:1 and 1:2) and left to incubate for 24h under constant agitation. Both compounds directly altered  $A\beta_f$  morphological presentation. Scale bars = 500 nm.

## Atomic Force Microscopy (AFM)

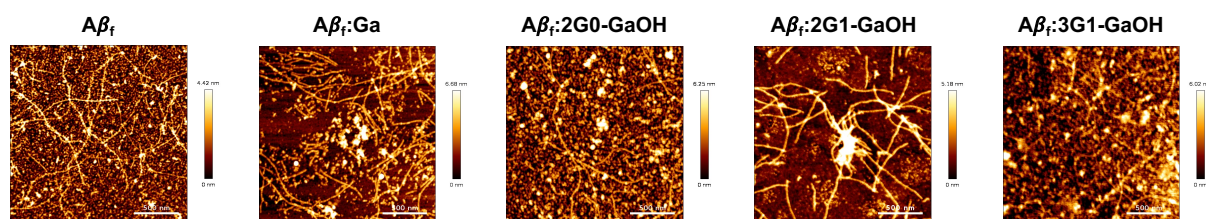

**Figure S45.** Representative AFM images of Aβ<sub>1</sub>. Each dendrimer was added into an Aβ<sub>1</sub> solution (Aβ<sub>1</sub>:Ga molar ratio of 1:1) and left to incubate for 24h under constant agitation. The dendrimers with higher number of Ga units (i.e., 2G1-GaOH and 3G1-GaOH) were more effective than Ga to alter the Aβ<sub>1</sub> presentation. Scale bars = 500 nm.

## Western Blot (WB) analysis

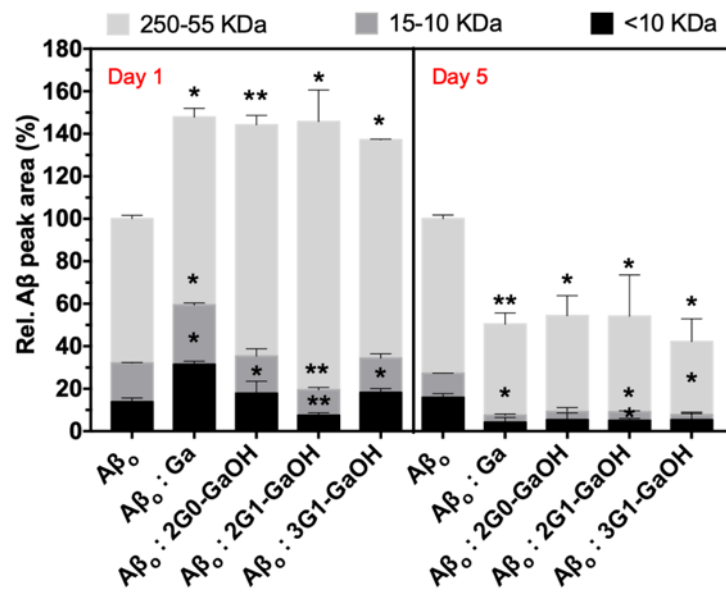

**Figure S46.** Relative densitometric bar graphs of Aβ<sub>0</sub> (25μM) assembly quantified by WB (using the antibody 6E10); experiments were executed at 37°C in PBS, during 1 and 5 days. Error bars = SD, \* p < 0.05, \*\* p < 0.01 and \*\*\* p < 0.001 vs control 25μM Aβ<sub>0</sub>; n=3.

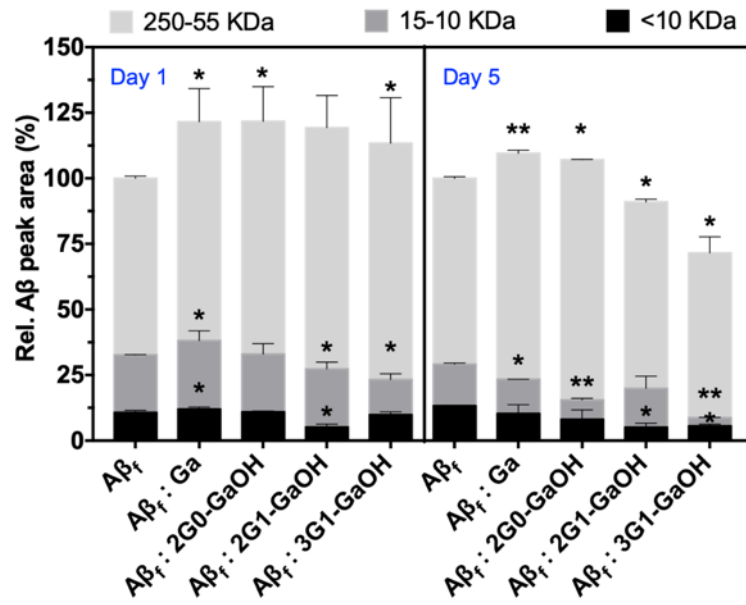

**Figure S47.** Relative densitometric bar graphs of Aβ<sub>f</sub> (25μM) disassembly quantified by WB (using the antibody 6E10); experiments were executed at 37°C in PBS, during 1 and 5 days. Error bars = SD, \* p < 0.05, \*\* p < 0.01 and \*\*\* p < 0.001 vs control 25μM Aβ<sub>f</sub>; n=3.



## 2 CELL STUDIES

### Ability of the dendrimers to modulate the A $\beta$ cytotoxicity

#### AlamarBlue® and Live/Dead assays

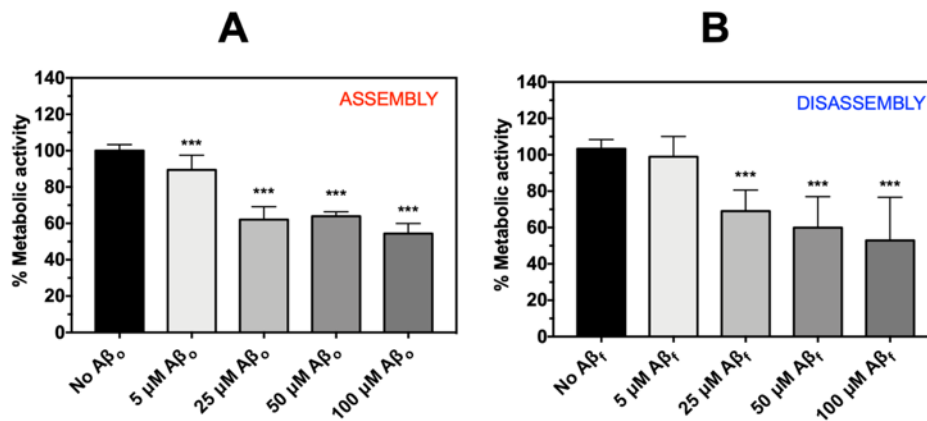

**Figure S48.** SH-SY5Y cell viability in the presence of (A) A $\beta$  oligomers (A $\beta_0$ , 25  $\mu$ M) and (B) A $\beta$  fibrils (A $\beta_1$ , 25  $\mu$ M) during 24h (using AlamarBlue® assay). Cells were incubated during 24h with different concentrations of A $\beta$ . \*  $p < 0.05$ , \*\*  $p < 0.01$ , \*\*\*  $p < 0.001$  (vs control);  $n=3$ .

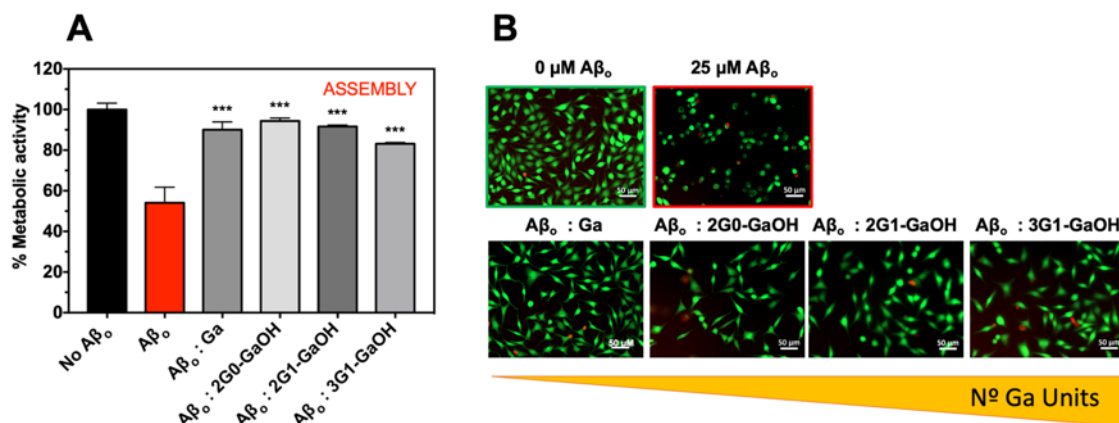

**Figure S49.** (A) Metabolic activity measured by AlamarBlue® assay of SH-SY5Y in the presence of a solution of A $\beta_0$  oligomeric species (25 $\mu$ M) during 24h, for a A $\beta$ :dendrimers concentration ratio of 1:1. \*\*\*  $p < 0.001$  (vs fibrillar A $\beta$ );  $n=3$ ; (B) Representative images of the Live/Dead assay. Scale bar = 50 $\mu$ m;  $n=3$ .

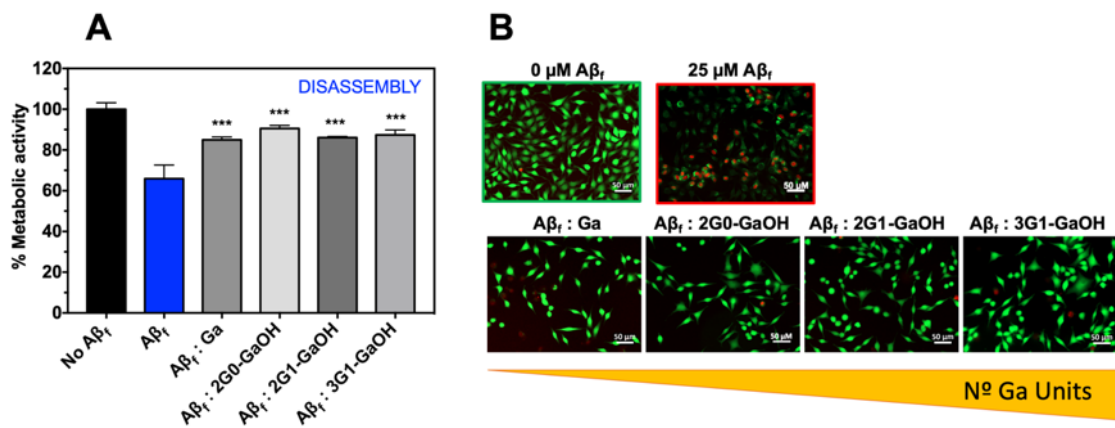

**Figure S50.** (A) Metabolic activity measured by AlamarBlue® assay of SH-SY5Y in the presence of a solution of Aβ<sub>f</sub> pre-formed fibrils (25μM) during 24h, for a Aβ:dendrimers concentration ratio of 1:1. \*\*\* p < 0.001 (vs No Aβ); n=3. (B) Representative images of the Live/Dead assay. Scale bar = 50μm; n=3.

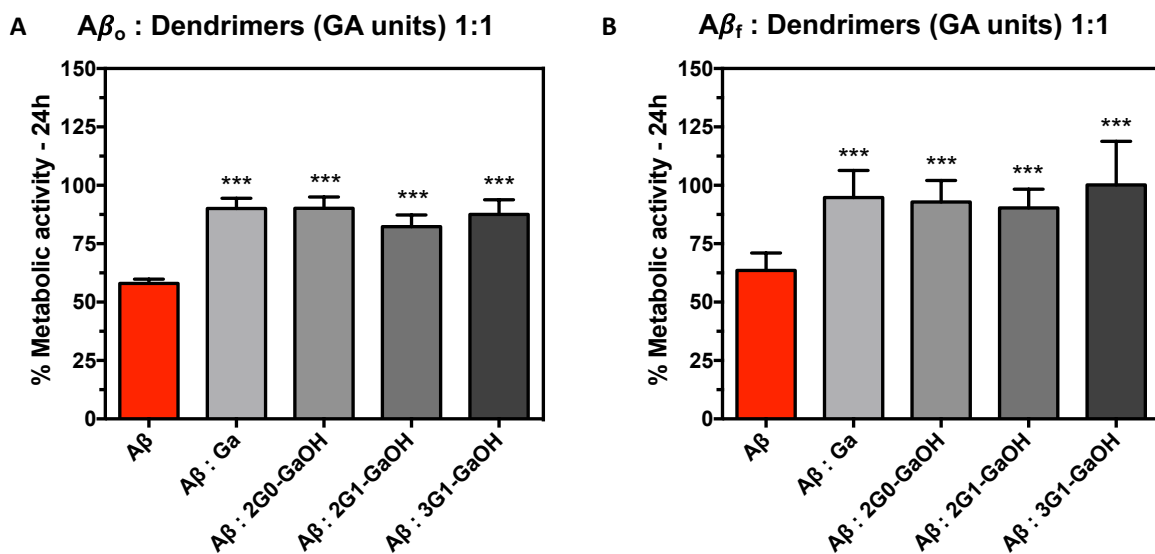

**Figure S51.** Metabolic activity measured by AlamarBlue® assay of SH-SY5Y in the presence of a solution of (A) Aβ<sub>o</sub> and (B) Aβ<sub>f</sub> pre-formed fibrils (25μM) during 24h. Experiments done at an Aβ:Ga molar ratio of 1:1. \*\*\* p < 0.001 (vs Aβ); n=3.

Quantification of the  $\beta$ -sheet content under cell culture determined by ThT assay

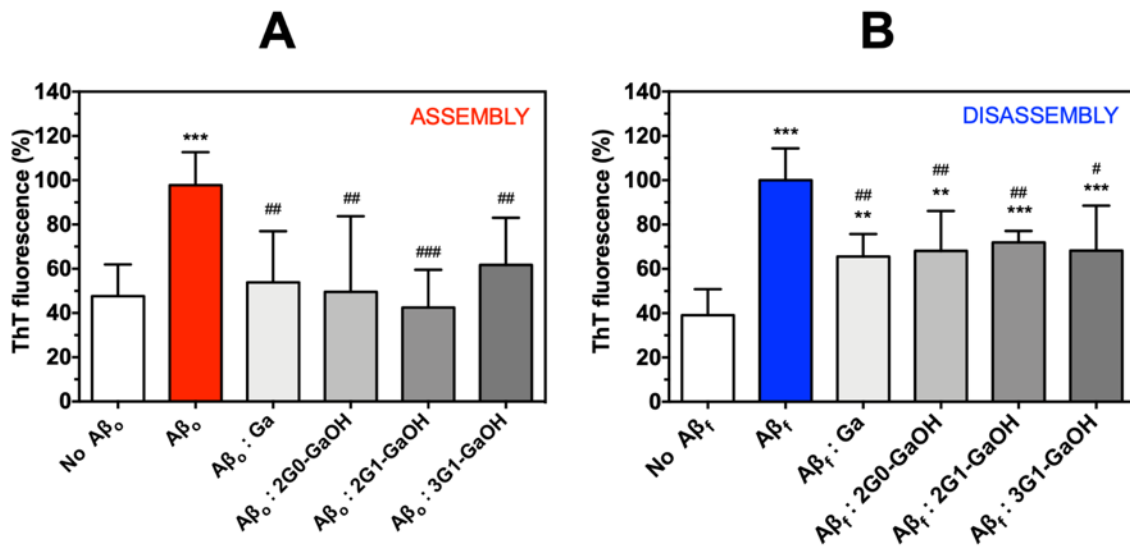

**Figure S52.** ThT fluorescence measurements in SH-SY5Y cell culture, after incubation with A $\beta_0$  (A) and A $\beta_t$  (B) species and dendrimers for a A $\beta$ :dendrimers concentration ratio of 1:1, during 1 day of culture. Error bars = SD, ### p < 0.01 (vs control 25 $\mu$ M A $\beta$ ); \* p < 0.05, \*\* p < 0.01 and \*\*\* p < 0.001 vs No A $\beta$ ; n=3.

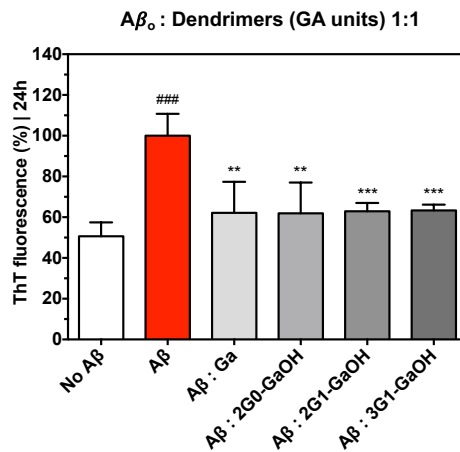

**Figure S53.** ThT fluorescence measurements in SH-SY5Y cell culture, after incubation with A $\beta_0$  species and dendrimers (A $\beta$ :Ga molar ratio of 1:1), during 1 day of culture. Error bars = SD, ### p < 0.01 (vs No A $\beta$ ); \*\* p < 0.01 and \*\*\* p < 0.001 vs control 25 $\mu$ M A $\beta$ ; n=3.

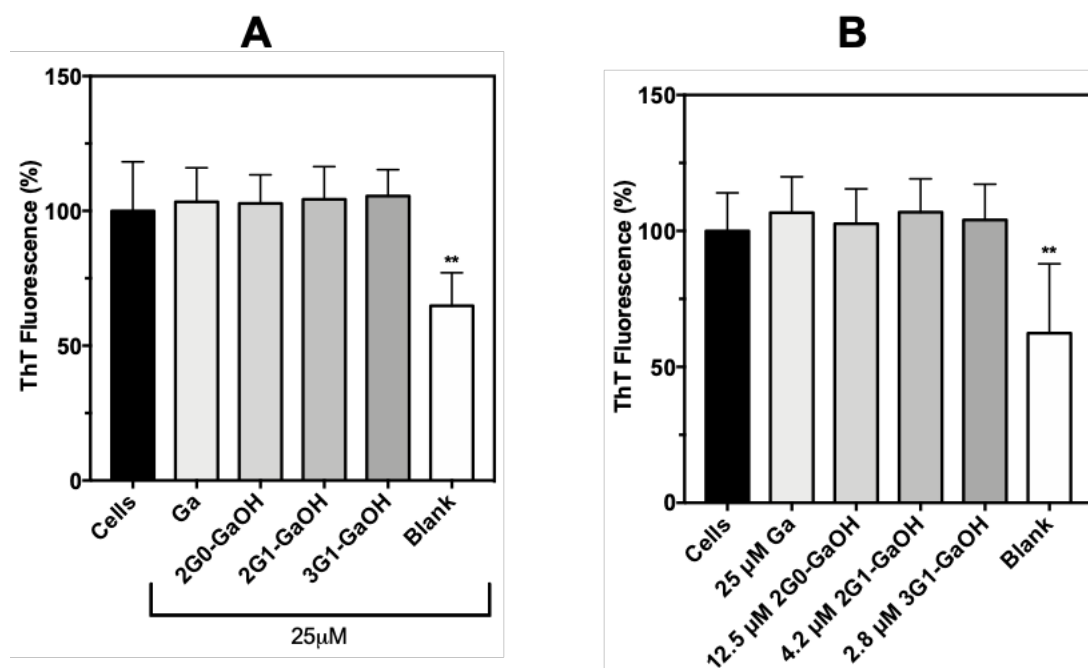

**Figure S54.** ThT fluorescence measurements in SH-SY5Y cell culture, after 1 day of incubation with A. solution of dendrimers at 25  $\mu\text{M}$  concentration and B. solution of dendrimers at the concentrations used in the multivalency experiments (i.e.,  $\text{A}\beta\text{:Ga}$  1:1 molar ratio, per gallate). Error bars = SD, \*\*  $p < 0.01$ ;  $n=3$ .

## Protein expression

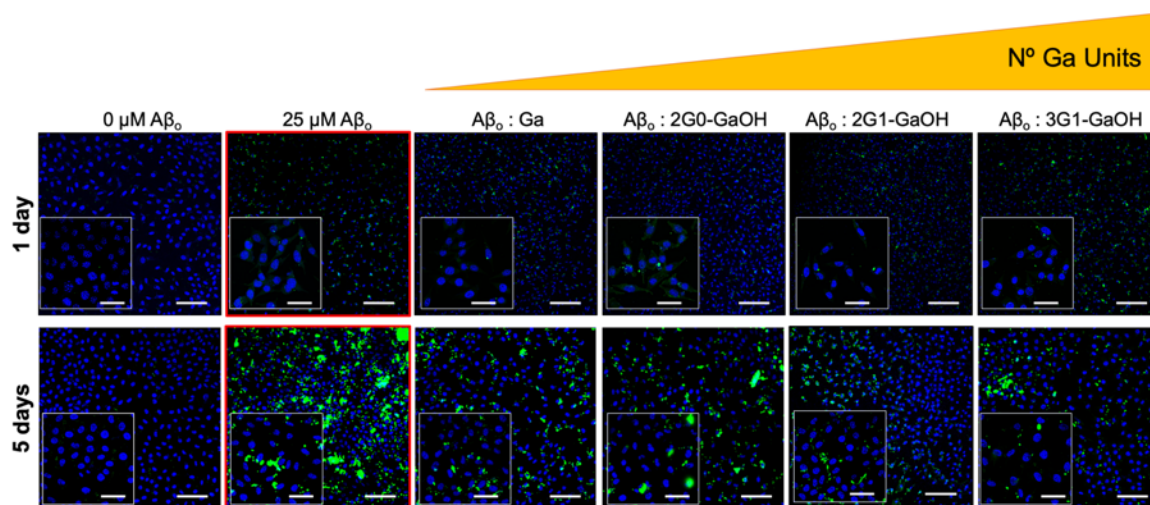

**Figure S55.** Immunofluorescence analysis of Aβ<sub>0</sub> species in the SH-SY5Y cell culture visualized by confocal microscopy (mAb 6E10, green) after incubation with dendrimers for a Aβ:dendrimer concentration ratio of 1:1, during 1 and 5 days (Aβ: green, cell nuclei: blue). Scale bar: 200μm (50μm for the insets).

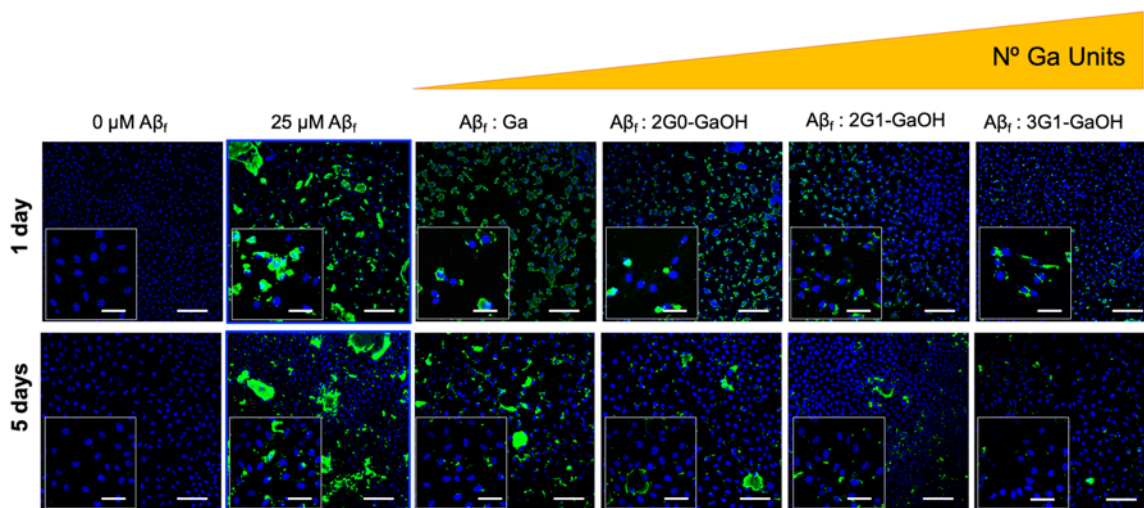

**Figure S56.** Immunofluorescence analysis of Aβ<sub>f</sub> species in the SH-SY5Y cell culture visualized by confocal microscopy (mAb 6E10, green) after incubation of dendrimers for a Aβ:dendrimers concentration ratio of 1:1, during 1 and 5 days (Aβ: green, cell nuclei: blue). Scale bar: 200 μm (50 μm for the insets).

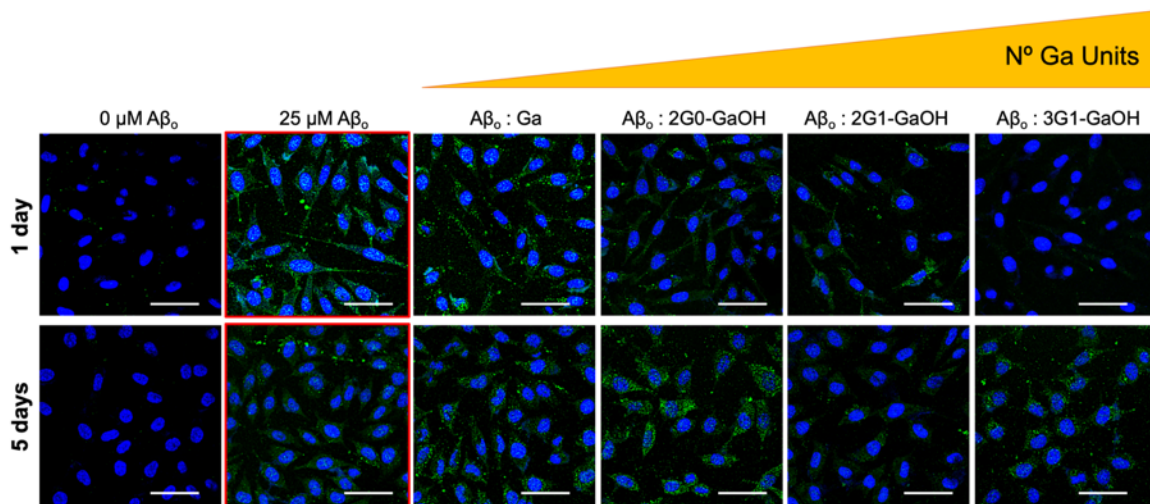

**Figure S57.** Immunofluorescence analysis of A $\beta_o$  species in the SH-SY5Y cell culture visualized by confocal microscopy (A11 antibody, green) after incubation of dendrimers for a A $\beta$ :dendrimers concentration ratio of 1:1, during 1 and 5 days (A $\beta$ : green, cell nuclei: blue). A11 antibody specifically bind to oligomeric A $\beta$  species. Scale bar: 50 $\mu$ m.

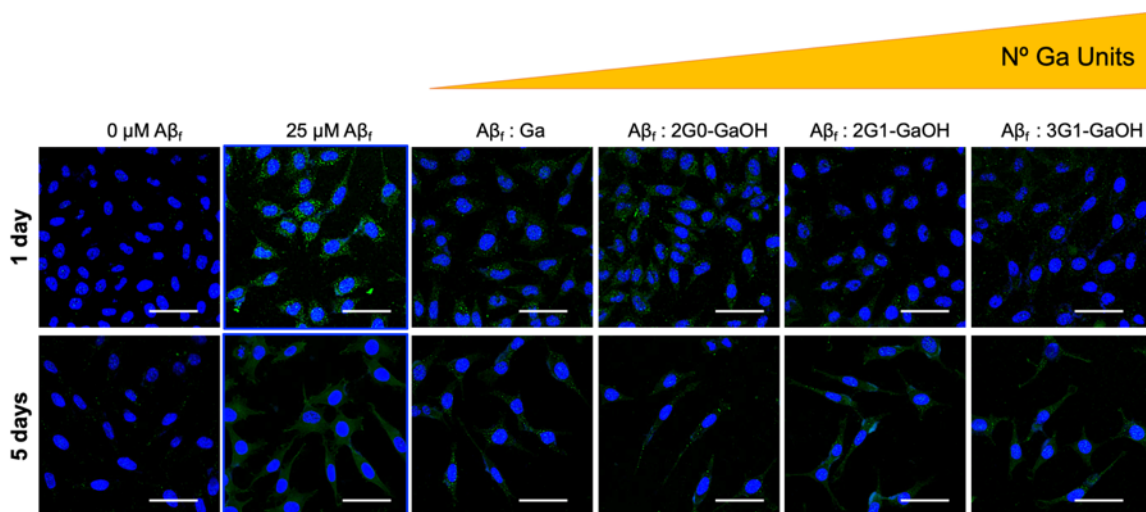

**Figure S58.** Immunofluorescence analysis of A $\beta_f$  species in the SH-SY5Y cell culture visualized by confocal microscopy (A11 antibody, green) after incubation of dendrimers to a 1:1 ratio, for 1 and 5 days (A $\beta$ : green, cell nuclei: blue). A11 antibody specifically bind to oligomeric A $\beta$  species. Scale bar: 50  $\mu$ m.

## Bio-AFM experiments

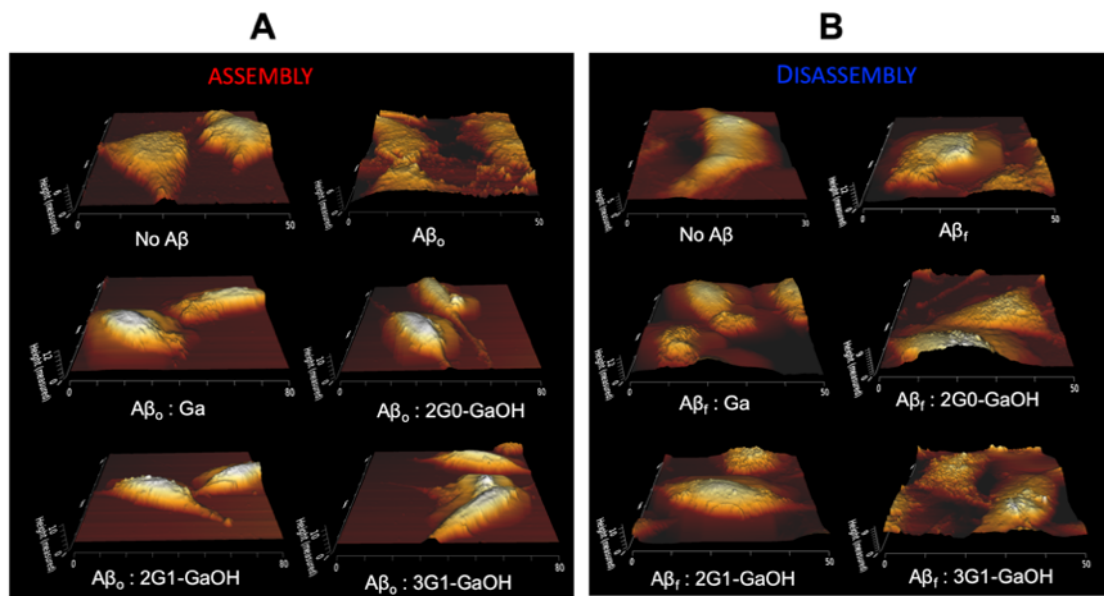

**Figure S59.** Representative AFM topographic images of SH-SY5Y cells cultured during 24h in the presence of (A)  $A\beta_0$  (assembly) and (B)  $A\beta_1$  (disassembly) and Ga, 2G0-GaOH, 2G1-GaOH and 3G1-GaOH using a  $A\beta$ :dendrimers ratio of 1:1.

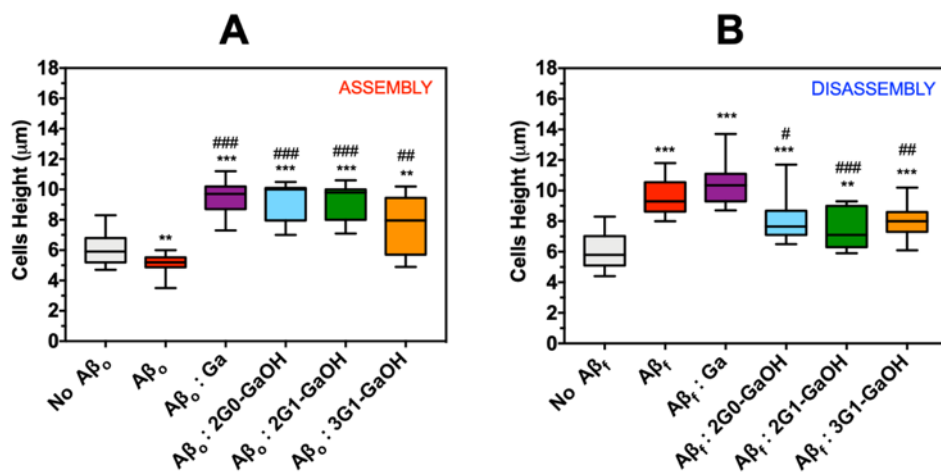

**Figure S60.** Statistical comparison of the cells height profile from the nanomechanical properties obtained by AFM topographic images of normal SH-SY5Y cells with 1:1 ratio of A $\beta$ :dendrimers, under different conditions: (A) assembly pathway (A $\beta_o$ ) and (B) disassembly pathway (A $\beta_f$ ). All experiments were conducted after 24h of incubation with A $\beta$  (25 $\mu$ M). Error bars = SD, ### p < 0.01 (vs No A $\beta$ ); \*\* p < 0.01 and \*\*\* p < 0.001 vs control 25 $\mu$ M A $\beta_o$ /A $\beta_f$ ; n=3.
